# Supplementary material
Source: ML conference proceedings conference paper supplement (https://openreview.net/forum?id=AVx0r_GppCu)
Supplement: supplementary_material [file attachment]

---

# Super-Acceleration with Cyclical Step-sizes

---

Anonymous Author(s)

Affiliation

Address

email

## Abstract

Cyclical step-sizes are becoming increasingly popular in the optimization of deep learning problems. Motivated by recent observations on the spectral gaps of Hessians in machine learning, we show that these step-size schedules offer a simple way to exploit them. More precisely, we develop a convergence rate analysis for quadratic objectives that provides optimal parameters and shows that cyclical learning rates can improve upon traditional lower complexity bounds. We further propose a systematic approach to design optimal first order methods for quadratic minimization with a given spectral structure. Finally, we provide a local convergence rate analysis beyond quadratic minimization for the proposed methods and illustrate our findings through benchmarks on least squares and logistic regression problems.

## 1 Introduction

One of the most iconic methods in first order optimization is gradient descent with momentum, also known as the heavy ball method [Polyak, 1964]. This method enjoys widespread popularity both in its original formulation and in a stochastic variant that replaces the gradient by a stochastic estimate, a method that is behind many of the recent breakthroughs in deep learning [Sutskever et al., 2013].

A variant of the stochastic heavy ball where the step-sizes are chosen in *cyclical* order has recently come to the forefront of machine learning research, showing state-of-the-art results on different deep learning benchmarks [Loshchilov and Hutter, 2017, Smith, 2017]. Inspired by this empirical success, we aim to study the convergence of the heavy ball algorithm where step-sizes  $h_0, h_1, \dots$  are not fixed or decreasing but instead chosen in cyclical order:

---

**Algorithm 1:** Cyclical heavy ball  $\text{HB}_K(h_0, \dots, h_{K-1}; m)$

---

**Input:** Initialization  $x_0$ , momentum  $m \in (0, 1)$ , step-sizes  $\{h_0, \dots, h_{K-1}\}$

---

$$x_1 = x_0 - \frac{h_0}{1+m} \nabla f(x_0)$$

**for**  $t = 1, 2, \dots$  **do**       $x_{t+1} = x_t - h_{\text{mod}(t,K)} \nabla f(x_t) + m(x_t - x_{t-1})$

**end**

---

The heavy ball method with constant step-sizes enjoys a mature theory, where it is known for example to achieve optimal black-box worst-case complexity of quadratic convex optimization [Nemirovsky, 1992]. In stark contrast, little is known about the convergence of the above variant with cyclical step-sizes. Our main motivating question is

Do cyclical step-sizes improve convergence of heavy ball?

Our **main contribution** provides a positive answer to this question and, more importantly, *quantifies* the speedup under different assumptions. In particular, we show that for quadratic problems, whenever Hessian's spectrum belongs to two or more disjoint intervals, the heavy ball method with cyclical step-sizes achieves a faster worst-case convergence rate. Recent works have shown that this assumption on the spectrum is quite natural and occurs in many machine learning problems, including deep neural networks [Sagun et al., 2017, Pappan, 2018, Ghorbani et al., 2019, Pappan, 2019]. More precisely, we list our main contributions below.

- In sections 3 and 4, we provide a **tight convergence rate analysis** of the cyclical heavy ball method (Theorems 3.1 and 3.2 for two step-sizes, and Theorem 4.8 for the general case). This analysis highlights a regime under which this method achieves a faster worst-case rate than the accelerated rate of heavy ball, a phenomenon we refer to as *super-acceleration*. Theorem 5.1 extends the (local) convergence rate analysis results to non-quadratic objectives.
- As a byproduct of the convergence-rate analysis, we obtain an explicit expression for the **optimal parameters** in the case of cycles of length two (Algorithm 2) and an implicit expression in terms of a system of  $K$  equations in the general case.
- Section 6 presents **numerical benchmarks** illustrating the improved convergence of the cyclical approach on 4 problems involving quadratic and logistic losses on both synthetic and a handwritten digits recognition dataset.
- Finally, we conclude in Section 7 with a discussion of this work's **limitations**.

## 2 Notation and Problem Setting

Throughout the paper, we consider the problem of minimizing quadratic functions of the form

$$\min_{x \in \mathbb{R}^d} f(x), \text{ with } f \in \mathcal{C}_\Lambda \triangleq \{f : f(x) = \frac{1}{2}(x - x_*)^T H(x - x_*) + f_*, \text{ Sp}(H) \subseteq \Lambda\}, \text{ (OPT)}$$

where  $\mathcal{C}_\Lambda$  is the class of quadratic functions whose spectrum  $\text{Sp}(H)$  is localized in  $\Lambda \subseteq [\mu, L] \subseteq \mathbb{R}_{>0}$ . We discuss more general settings beyond quadratic minimization in Section 5.

The condition  $\Lambda \subseteq [\mu, L]$  implies all quadratic functions under consideration are  $L$ -smooth and  $\mu$ -strongly convex. For this function class, we define  $\kappa$ , the (inverse) condition number, and  $\rho$ , the ratio between the center of  $\Lambda$  and its radius, as

$$\kappa \triangleq \frac{L}{\mu}, \quad \rho \triangleq \frac{L+\mu}{L-\mu} = \left( \frac{1+\kappa}{1-\kappa} \right). \quad (1)$$

Finally, for a method solving (OPT) that generates a sequence of iterates  $\{x_t\}$ , we define its worst-case rate  $r_t$  and its asymptotic rate factor  $\tau$  as

$$r_t \triangleq \sup_{x_0 \in \mathbb{R}^d, f \in \mathcal{C}_\Lambda} \frac{\|x_t - x_*\|}{\|x_0 - x_*\|}, \quad 1 - \tau \triangleq \limsup_{t \rightarrow \infty} \sqrt[t]{r_t}. \quad (2)$$

## 3 Super-acceleration with Cyclical Step-sizes

---

**Algorithm 2:** Cyclical ( $K = 2$ ) heavy ball with with optimal parameters

---

**Input:** Initialization  $x_0, \mu_1 < L_1 < \mu_2 < L_2$  (where  $L_1 - \mu_1 = L_2 - \mu_2$ )

**Set:**  $\rho = \frac{L_2 + \mu_1}{L_2 - \mu_1}, R = \frac{\mu_2 - L_1}{L_2 - \mu_1}, m = \left( \frac{\sqrt{\rho^2 - R^2} - \sqrt{\rho^2 - 1}}{\sqrt{1 - R^2}} \right)^2$

$x_1 = x_0 - \frac{1}{L_1} \nabla f(x_0)$

**for**  $t = 1, 2, \dots$  **do**

$h_t = \frac{1+m}{L_1}$  (if  $t$  is even),  $h_t = \frac{1+m}{\mu_2}$  (if  $t$  is odd)

$x_{t+1} = x_t - h_t \nabla f(x_t) + m(x_t - x_{t-1})$

**end**

---

In this section we develop one of our main contributions, a convergence rate analysis of the cyclical heavy ball method with cycles of length 2. This analysis crucially depends on the location of the Hessian's eigenvalues; we assume that these are contained in a set  $\Lambda$  that is the union of 2 intervals of the same size

$$\Lambda = [\mu_1, L_1] \cup [\mu_2, L_2], \quad L_1 - \mu_1 = L_2 - \mu_2. \quad (3)$$

By symmetry, this set is alternatively described by

$$\mu \triangleq \mu_1, \quad L \triangleq L_2 \quad \text{and} \quad R \triangleq \frac{\mu_2 - L_1}{L_2 - \mu_1}, \quad (4)$$

where  $R$  is the relative length of the gap  $\mu_2 - L_1$  with respect to the diameter  $L_2 - \mu_1$  (see Figure 1). This parametrization will reveal very convenient as the relative gap will play a crucial role in the convergence rate analysis. Note also that the gap assumption comes without loss of generality, as we allow  $R = 0$ .

Through a correspondence between optimization methods and polynomials that we expand upon in Section 4, we can derive a worst-case analysis for the cyclical heavy ball method. The outcome of this analysis is in the following theorem, that provides the asymptotic convergence rate of Algorithm 1 for cycles of length two. All proofs of results in this section can be found in Appendix D.3.

**Theorem 3.1** (Rate factor of  $\text{HB}_2(h_0, h_1; m)$ ). *Let  $f \in \mathcal{C}_\Lambda$  and  $h_0, h_1, m \geq 0$ . The asymptotic rate factor of Algorithm 1 with cycles of length two is*

$$1 - \tau = \begin{cases} \sqrt{m} & \text{if } \sigma_{\text{sup}} \leq 1, \\ \sqrt{m} \left( \sigma_{\text{sup}} + \sqrt{\sigma_{\text{sup}}^2 - 1} \right)^{\frac{1}{2}} & \text{if } \sigma_{\text{sup}} \in \left( 1, \frac{1+m^2}{2m} \right), \\ \geq 1 \text{ (no convergence)} & \text{if } \frac{1+m^2}{2m} \leq \sigma_{\text{sup}}, \end{cases} \quad (5)$$

$$\text{with} \quad \sigma_{\text{sup}} = \sup_{\lambda \in \{\mu_1, L_1, \mu_2, L_2, \frac{h_0+h_1}{2h_0h_1}\} \cap \Lambda} \left| 2 \left( \frac{1+m-\lambda h_0}{2\sqrt{m}} \right) \left( \frac{1+m-\lambda h_1}{2\sqrt{m}} \right) - 1 \right|. \quad (6)$$

This theorem gives the convergence rate for all triplets  $(m, h_0, h_1)$ . By evaluating this expression over a grid of step-sizes, Figure 2 shows how the rate changes as a function of both step-sizes:

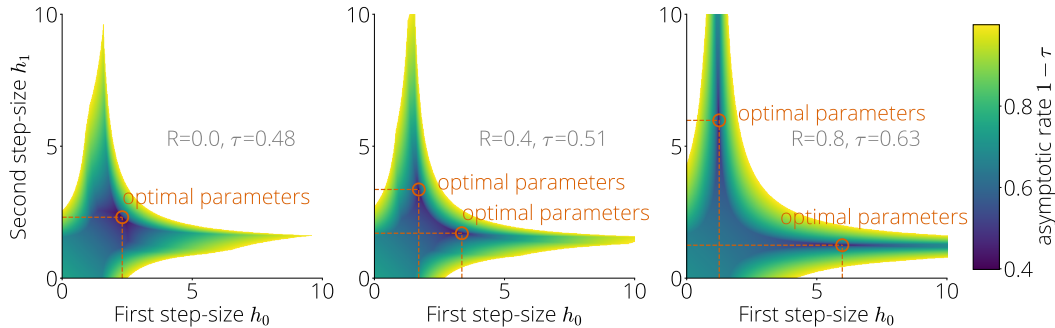

Figure 2: **Asymptotic rate of cyclical ( $K = 2$ ) heavy ball** in terms of its step-sizes  $h_0, h_1$  across 3 different values of the relative gap  $R$ . In the **left** plot, the relative gap is zero, and so the step-sizes with smallest rate coincide ( $h_0 = h_1$ ). For non-zero values of  $R$  (**center and right**), the optimal method instead alternates between two *different* step-sizes. In all plots the momentum parameter  $m$  is set according to Algorithm 2.

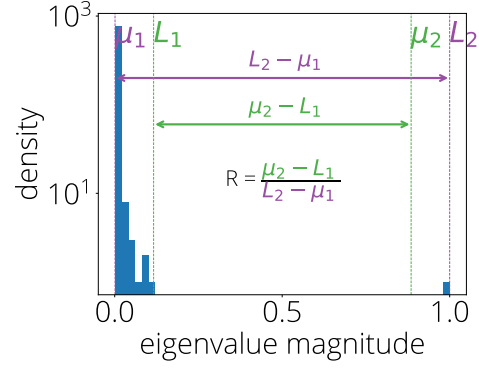

Figure 1: Hessian eigenvalue histogram for a quadratic objective on MNIST. The outlier eigenvalue at  $L_2$  generates a non-zero relative gap  $R = 0.77$ . Under these conditions, the 2-cycle heavy ball method has a faster asymptotic rate than the single-cycle one (see Section 3.1).

From the asymptotic rate expression of Theorem 3.1 we can optimize over the parameters  $(h_0, h_1, m)$  to obtain the method with smallest convergence rate. This leads to our other main contribution of this section, the *asymptotically optimal* Algorithm 2. This algorithm enjoys the following rate:

**Corollary 3.2.** *The worst-case (asymptotic) rates  $r_t^{Alg. 2}$  and  $1 - \tau^{Alg. 2}$  of Algorithm 2 over  $\mathcal{C}_\Lambda$  are*

$$r_t^{Alg. 2} = \left(1 + t \sqrt{\frac{\rho^2 - 1}{\rho^2 - R^2}}\right) \left(\frac{\sqrt{\rho^2 - R^2} - \sqrt{\rho^2 - 1}}{\sqrt{1 - R^2}}\right)^t, \quad 1 - \tau^{Alg. 2} = \frac{\sqrt{\rho^2 - R^2} - \sqrt{\rho^2 - 1}}{\sqrt{1 - R^2}} \quad \text{for } t \text{ even.}$$

### 3.1 Comparison with Polyak Heavy Ball

In the absence of eigenvalue gap ( $R = 0$  and  $\Lambda = [\mu, L]$ ), Algorithm 2 reduces to Polyak heavy ball (PHB) [Polyak, 1964], whose worst-case rate is detailed in Appendix B. Since the asymptotic rate of Algorithm 2 is monotonically decreasing in  $R$ , it is always better or equal than PHB. Furthermore, in the ill-conditioned regime (small  $\kappa$ ), the comparison is particularly simple: the optimal 2-cycle algorithm has a  $\sqrt{1 - R^2}$  relative improvement over PHB, as provided by the next proposition. A more thorough comparison for different support sets  $\Lambda$  is discussed in Table 1.

**Proposition 3.3.** *Let  $R \in [0, 1)$ . The rate factors of respectively Algorithm 2 and PHB verify*

$$1 - \tau^{Alg. 2} \underset{\kappa \rightarrow 0}{=} 1 - \frac{2\sqrt{\kappa}}{\sqrt{1 - R^2}} + o(\sqrt{\kappa}), \quad 1 - \tau^{PHB} \underset{\kappa \rightarrow 0}{=} 1 - 2\sqrt{\kappa} + o(\sqrt{\kappa}). \quad (7)$$

| Relative gap $R$          | Set $\Lambda$                                                              | Rate factor $\tau$                      | Speedup $\tau/\tau^{PHB}$  |
|---------------------------|----------------------------------------------------------------------------|-----------------------------------------|----------------------------|
| $R \in [0, 1)$            | $[\mu, \mu + R(L - \mu)] \cup [L - R(L - \mu), L]$                         | $\frac{2\sqrt{\kappa}}{\sqrt{1 - R^2}}$ | $(1 - R^2)^{-\frac{1}{2}}$ |
| $R = 1 - \sqrt{\kappa}/2$ | $[\mu, \mu + \frac{\sqrt{\mu L}}{4}] \cup [L - \frac{\sqrt{\mu L}}{4}, L]$ | $2\sqrt[4]{\kappa}$                     | $\kappa^{-\frac{1}{4}}$    |
| $R = 1 - 2\gamma\kappa$   | $[\mu, (1 + \gamma)\mu] \cup [L - \gamma\mu, L]$                           | indep. of $\kappa$                      | $O(\sqrt{\kappa})$         |

Table 1: Case study of the convergence of Algorithm 2 as a function of  $R$ , in the regime  $\kappa \rightarrow 0$ . The **first line** corresponds to the regime where  $R$  is independent of  $\kappa$ , and we observe a constant gain w.r.t. PHB. The **second line** considers a setting in which  $R$  depends on  $\sqrt{\kappa}$ , that is, the two intervals in  $\Lambda$  are relatively small. The asymptotic rate reads  $(1 - 2\sqrt[4]{\kappa})^t$ , beating the classical  $(1 - 2\sqrt{\kappa})^t$  lower bound, unimprovable when  $R = 0$ . Finally, in the **third line**,  $R$  depends on  $\kappa$ , the two intervals in  $\Lambda$  are so small that the convergence becomes  $O(1)$ , i.e., is independent of  $\kappa$ .

## 4 A constructive Approach: Minimax Polynomials

This section presents a generic framework (Algorithm 3) that allows designing optimal momentum and step-size cycles for given sets  $\Lambda$  and cycle length  $K$ .

**Algorithm 3:** Optimal momentum method with cyclical step-sizes

**Input:** Eigenvalue localization  $\Lambda$ , cycle length  $K$ , initialization  $x_0$ .

**Preprocessing:**

1. Find the polynomial  $\sigma_K^\Lambda$  such that it satisfies (16).
2. Set step-sizes  $\{h_i\}_{i=0, \dots, K-1}$  and momentum  $m$  that satisfy resp. equations (21) and (22).

**Set**  $x_1 = x_0 - \frac{h_0}{1+m} \nabla f(x_0)$

**for**  $t = 1, 2, \dots$  **do**  $x_{t+1} = x_t - h_{\text{mod}(t, K)} \nabla f(x_t) + m(x_t - x_{t-1})$   
|   
**end**

We first recall classical results that link optimal first order methods on quadratics and Chebyshev polynomials. Then, we generalize the approach by showing that optimal methods can be viewed as

combinations of Chebyshev polynomials, and minimax polynomials  $\sigma_K^\Lambda$  of degree  $K$  over the set  $\Lambda$ . Finally, we show how to recover the step-size schedule from  $\sigma_K^\Lambda$ .

#### 4.1 First Order Methods on Quadratics and Polynomials

A key property that we will use extensively in the analysis is the following link between first order methods and polynomials (see [Hestenes and Stiefel, 1952]).

**Proposition 4.1.** *Let  $f \in \mathcal{C}_\Lambda$ . The iterates  $x_t$  satisfy*

$$x_{t+1} \in x_0 + \text{span}\{\nabla f(x_0), \dots, \nabla f(x_t)\}, \quad (8)$$

where  $x_0$  is the initial approximation of  $x_*$ , if and only if there exists a sequence of polynomials  $(P_t)_{t \in \mathbb{N}}$ , each of degree at most 1 more than the highest degree of all previous polynomials and  $P_0$  of degree 0 (hence the degree of  $P_t$  is at most  $t$ ), such that

$$\forall t \quad x_t - x_* = P_t(H)(x_0 - x_*), \quad P_t(0) = 1. \quad (9)$$

**Example 4.2** (Gradient descent). Consider the gradient descent algorithm with fixed step-size  $h$ , applied to problem (OPT). Then, after unrolling the update, we have

$$x_{t+1} - x_* = x_t - x_* - h \nabla f(x_t) = x_t - x_* - hH(x_t - x_*) = (I - hH)^{t+1}(x_0 - x_*). \quad (10)$$

In this case, the polynomial associated to gradient descent is  $P_t(\lambda) = (1 - h\lambda)^t$ .

The above proposition can be used to obtain worst-case rates for first order methods by bounding their associated polynomials. Indeed, using the Cauchy-Schwartz inequality in (9) leads to

$$\|x_t - x_*\| \leq \sup_{\lambda \in \Lambda} |P_t(\lambda)| \|x_0 - x_*\| \implies r_t = \sup_{\lambda \in \Lambda} |P_t(\lambda)|, \quad \text{where } P(0) = 1. \quad (11)$$

Therefore, finding the algorithm with the fastest worst-case rate can be equivalently framed as the problem of finding the polynomial with smallest value on the eigenvalue support  $\Lambda$ , subject to the normalization condition  $P_t(0) = 1$ . Such polynomials are referred to as **minimax**. Throughout the paper, we use this polynomial-based approach to find methods with optimal rates.

An important property of minimax polynomials is their *equioscillation* on  $\Lambda$  (see Theorem C.1 and its proof for a formal statement).

**Definition 4.3.** (Equioscillation) A polynomial  $P_t$  equioscillates on  $\Lambda$  if it verifies  $P_t(0) = 1$  and there exist  $\lambda_0 < \lambda_1 < \dots < \lambda_t \in \Lambda$  such that

$$P_t(\lambda_i) = (-1)^i \max_{\lambda \in \Lambda} |P_t(\lambda)|. \quad (12)$$

**Example 4.4** ( $\Lambda$  is an interval). The  $t$ -th order Chebyshev polynomials of the first kind  $T_t$  satisfy the *equioscillation* property on  $[-1, 1]$ . It follows that minimax polynomials on  $\Lambda = [\mu, L]$  can be obtained by composing the Chebyshev polynomial  $T_t$  with the linear transformation  $\sigma_1^\Lambda$ :

$$\frac{T_t(\sigma_1^\Lambda(\lambda))}{T_t(\sigma_1^\Lambda(0))} = \arg \min_{P \in \mathbb{R}_t[X], P(0)=1} \sup_{\lambda \in \Lambda} |P(\lambda)|, \quad \text{with } \sigma_1^\Lambda(\lambda) = \frac{L + \mu}{L - \mu} - \frac{2}{L - \mu} \lambda, \quad (13)$$

where  $\sigma_1^\Lambda$  maps the interval  $[\mu, L]$  to  $[-1, 1]$ . The optimization method associated with this minimax polynomial is the Chebyshev semi-iterative method [Flanders and Shortley, 1950, Golub and Varga, 1961] (described also in Appendix B.1). This method achieves the lower complexity bound for smooth strongly convex quadratic minimization, see for instance [Nemirovsky, 1995, Chapter 12] or [Nemirovsky, 1992, Nesterov, 2003].

The next proposition provides the main results in this subsection, which is key for obtaining Algorithm 2. It characterizes the even degree minimax polynomial in the setting of Section 3, that is, when  $\Lambda$  is the union of 2 intervals of same size. In this case, the minimax solution is also based on Chebyshev polynomials, but composed with a degree-two polynomial  $\sigma_2^\Lambda$ .

**Proposition 4.5.** *Let  $\Lambda = [\mu_1, L_1] \cup [\mu_2, L_2]$  be an union of two intervals of the same size ( $L_1 - \mu_1 = L_2 - \mu_2$ ) and let  $m$  be as defined in Algorithm 2. Then the minimax polynomial (solution to (12)) is, for all  $t = 2n$ ,  $n \in \mathbb{N}_0^+$ ,*

$$\frac{T_n(\sigma_2^\Lambda(\lambda))}{T_n(\sigma_2^\Lambda(0))} = \arg \min_{P \in \mathbb{R}_t[X], P(0)=1} \sup_{\lambda \in \Lambda} |P(\lambda)|, \quad \text{with } \sigma_2^\Lambda(\lambda) = 2 \left( \frac{1+m}{2\sqrt{m}} \right)^2 \left( 1 - \frac{\lambda}{L_1} \right) \left( 1 - \frac{\lambda}{\mu_2} \right) - 1.$$

## 4.2 Generalization to Longer Cycles

The polynomial in Example 4.4 uses a linear link function  $\sigma_1^\Lambda$  to map  $\Lambda$  to  $[-1, 1]$ . In Proposition 4.5, we see that a degree *two* link function  $\sigma_2^\Lambda$  can be used to find the minimax polynomial when  $\Lambda$  is the union of two intervals. This section generalizes this approach and considers higher-order polynomials for  $\sigma_K$ . We start with the following parametrization, with an arbitrary polynomial  $\sigma_K$  of degree  $K$ ,

$$P_t(\lambda; \sigma_K) \triangleq \frac{T_n(\sigma_K(\lambda))}{T_n(\sigma_K(0))}, \quad \forall t = Kn, n \in \mathbb{N}_0^+. \quad (14)$$

As we will see in the next subsection, this parametrization allows considering cycles of step-sizes. Our goal now is to find the  $\sigma_K$  that obtains the fastest convergence rate possible. The next proposition quantifies its impact on the asymptotic rate and its proof can be found in Appendix D.1.

**Proposition 4.6.** *For a given  $\sigma_K$  such that  $\sup_{\lambda \in \Lambda} |\sigma_K(\lambda)| = 1$ , the asymptotic rate factor  $\tau^{\sigma_K}$  of the method associated to the polynomial (14) is*

$$1 - \tau^{\sigma_K} = \lim_{t \rightarrow \infty} \sqrt[t]{\sup_{\lambda \in \Lambda} |P_t(\lambda; \sigma_K)|} = \left( \sigma_0 - \sqrt{\sigma_0^2 - 1} \right)^{\frac{1}{K}}, \quad \text{with } \sigma_0 \triangleq \sigma_K(0). \quad (15)$$

For a fixed  $K$ , the asymptotic rate (15) is a decreasing function of  $\sigma_0$ . This motivates the introduction of the “optimal” degree  $K$  polynomial  $\sigma_K^\Lambda$  as the one that solves

$$\sigma_K^\Lambda \triangleq \arg \max_{\sigma \in \mathbb{R}_K[X]} \sigma(0) \quad \text{s.t.} \quad \sup_{\lambda \in \Lambda} |\sigma(\lambda)| = 1. \quad (16)$$

Using the above definition, we recover the  $\sigma_1^\Lambda$  and  $\sigma_2^\Lambda$  from Example 4.4 and Proposition 4.5.

**Finding the polynomial.** Finding an exact and explicit solution for the general  $K$  and  $\Lambda$  case is unfortunately out of reach, as it involves solving a potentially difficult system of  $K$  non-linear equations. Here we describe an approximate approach. Let  $\sigma_K^\Lambda(x) = \sum_{i=0}^K \sigma_i x^i$ . We propose to discretize  $\Lambda$  into  $N$  different points  $\{\lambda_j\}$ , then solve the linear problem

$$\max_{\sigma_i} \sigma_0 \quad \text{s.t.} \quad -1 \leq \sum_{i=0}^K \sigma_i \lambda_j^i \leq 1, \quad \forall j = 1, \dots, N. \quad (17)$$

To check the optimality, it suffices to verify that the polynomial  $\sigma_K^\Lambda$  satisfies the *equioscillation* property (Definition 4.3), as depicted in Figure 3.

**Remark 4.7** (Relationship between optimal and minimax polynomials). For later reference, we note that the optimal polynomial  $\sigma_K^\Lambda$  is equivalent to finding a minimax polynomial on  $\Lambda$  and to rescale it. More precisely,  $\sigma_K^\Lambda$  is optimal if and only if  $\sigma_K^\Lambda / \sigma_K^\Lambda(0)$  is minimax.

## 4.3 Cyclical Heavy Ball and (Non-)asymptotic Rates of Convergence

We now describe the link between  $\sigma_K^\Lambda$  and Algorithm 3. Using the recurrence for Chebyshev polynomials of the first kind in (14), we have  $\forall t = Kn, n \in \mathbb{N}_0^+$ ,

$$\frac{T_{n+1}(\sigma_K^\Lambda(\lambda))}{T_{n+1}(\sigma_K^\Lambda(0))} = 2\sigma_K^\Lambda(\lambda) \underbrace{\left[ \frac{T_n(\sigma_K^\Lambda(\lambda))}{T_n(\sigma_K^\Lambda(0))} \right]}_{=a_n} - \underbrace{\left[ \frac{T_{n-1}(\sigma_K^\Lambda(\lambda))}{T_{n-1}(\sigma_K^\Lambda(0))} \right]}_{=b_n} \left[ \frac{T_{n-1}(\sigma_K^\Lambda(0))}{T_{n+1}(\sigma_K^\Lambda(0))} \right].$$

It still remains to find an algorithm associated with this polynomial. To obtain one in the form of Algorithm 1, one can use the stationary behavior of the recurrence. From [Scieur and Pedregosa, 2020], the coefficients  $a_n$  and  $b_n$  converge as  $n \rightarrow \infty$  to their fixed-points  $a_\infty$  and  $b_\infty$ . We therefore consider here an asymptotic polynomial  $\bar{P}_t(\lambda; \sigma_K^\Lambda)$ , whose recurrence satisfies

$$\bar{P}_t(\lambda; \sigma_K^\Lambda) = 2a_\infty \sigma_K^\Lambda(\lambda) \bar{P}_{t-K}(\lambda; \sigma_K^\Lambda) - b_\infty \bar{P}_{t-2K}(\lambda; \sigma_K^\Lambda). \quad (18)$$

Similarly to  $K = 1$ , where this limit recursion corresponds to PHB, this recursion corresponds to an instance of Algorithm 3 (see Proposition 4.9 below), further motivating the cyclical heavy ball algorithm.

The following theorem is the main result of this section and characterizes the convergence rate of Algorithm 1 for arbitrary momentum and step-size sequences  $\{h_i\}_{i \in \llbracket 1, K \rrbracket}$ . By optimizing over these parameters, we obtain a method associated to (18), whose rate is described in Proposition 4.9. All proofs can be found in Appendix D.2.

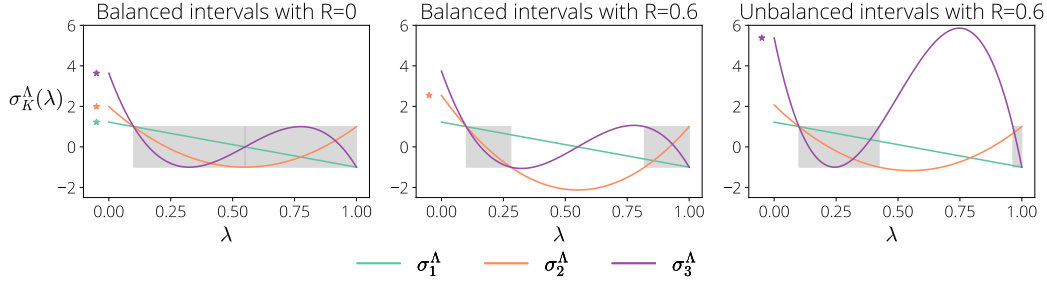

Figure 3: Examples of optimal polynomials  $\sigma_K^\Lambda$  from (16), all of them verifying the equioscillation property (Definition 4.3). The “ $\star$ ” symbol highlights the degree of  $\sigma_K^\Lambda$  that achieves the best asymptotic rate  $\tau^{\sigma_K^\Lambda}$  in (15) amongst all  $K$  (see Section 4.4). **(Left)** When  $\Lambda$  is an unique interval, all 3 polynomials are equivalently optimal  $\tau^{\sigma_1^\Lambda} = \tau^{\sigma_2^\Lambda} = \tau^{\sigma_3^\Lambda}$ . **(Center)** When  $\Lambda$  is the union of two intervals of the same size, the degree 2 polynomial is optimal  $\tau^{\sigma_2^\Lambda} > \tau^{\sigma_3^\Lambda} > \tau^{\sigma_1^\Lambda}$ . This is expected given the result in Proposition 4.5. **(Right)** When  $\Lambda$  is the union of two unbalanced intervals, the degree 3 polynomial instead achieves the best asymptotic rate  $\tau^{\sigma_3^\Lambda} > \tau^{\sigma_2^\Lambda} > \tau^{\sigma_1^\Lambda}$  (see Section 4.4).

**Theorem 4.8.** The worst-case rate of convergence of Algorithm 1 on  $\mathcal{C}_\Lambda$  with an arbitrary momentum  $m$  and an arbitrary sequence of step-sizes  $\{h_i\}$  is

$$1 - \tau = \begin{cases} \sqrt{m}, & \text{if } \sigma_{\sup} \leq 1 \\ \sqrt{m} \left( \sigma_{\sup} + \sqrt{\sigma_{\sup}^2 - 1} \right)^{1/K}, & \text{if } \sigma_{\sup} \in \left( 1, \frac{1 + m^K}{2(\sqrt{m})^K} \right) \\ \geq 1 \text{ (no convergence)} & \text{if } \sigma_{\sup} \geq \frac{1 + m^K}{2(\sqrt{m})^K} \end{cases}, \quad (19)$$

where  $\sigma_{\sup} \triangleq \sup_{\lambda \in \Lambda} |\sigma(\lambda; \{h_i\}, m)|$ , and  $\sigma(\lambda; \{h_i\}, m)$  is the  $K$ -degree polynomial

$$\sigma(\lambda; \{h_i\}, m) \triangleq \frac{1}{2} \text{Tr} \left( \begin{bmatrix} \frac{1+m-h_{K-1}\lambda}{\sqrt{m}} & -1 \\ 1 & 0 \end{bmatrix} \begin{bmatrix} \frac{1+m-h_{K-2}\lambda}{\sqrt{m}} & -1 \\ 1 & 0 \end{bmatrix} \cdots \begin{bmatrix} \frac{1+m-h_0\lambda}{\sqrt{m}} & -1 \\ 1 & 0 \end{bmatrix} \right). \quad (20)$$

**Proposition 4.9.** Let  $\sigma(\lambda; \{h_i\}, m)$  be the polynomial defined by (20), and  $\sigma_K^\Lambda$  be the optimal link function of degree  $K$  defined by (16). If the momentum  $m$  and the sequence of step-sizes  $\{h_i\}$  satisfy

$$\sigma(\lambda; \{h_i\}, m) = \sigma_K^\Lambda(\lambda), \quad (21)$$

then 1) the parameters are optimal, in the sense that they minimize the asymptotic rate factor from Theorem 4.8, 2) the optimal momentum parameter is

$$m = (\sigma_0 - \sqrt{\sigma_0^2 - 1})^{2/K}, \quad \text{where } \sigma_0 = \sigma_K^\Lambda(0), \quad (22)$$

3) the iterates from Algo. 3 with parameters  $\{h_i\}$  and  $m$  form a polynomial with recurrence (18), and 4) Algorithm 3 achieves the worst-case rate  $r_t^{\text{Alg. 3}}$  and the asymptotic rate factor  $1 - \tau^{\text{Alg. 3}}$

$$r_t^{\text{Alg. 3}} = O \left( t \left( \sigma_0 - \sqrt{\sigma_0^2 - 1} \right)^{t/K} \right), \quad 1 - \tau^{\text{Alg. 3}} = \left( \sigma_0 - \sqrt{\sigma_0^2 - 1} \right)^{1/K}. \quad (23)$$

**Solving the system (21)** The system is constructed by identification of the coefficients in both polynomials  $\sigma_K^\Lambda$  and  $\sigma(\lambda; \{h_i\}, m)$ , which can be solved using a naive grid-search for instance. We are not aware of any efficient algorithm to solve this system exactly, although it is possible to use iterative methods such as steepest descent or Newton’s method.



#### 4.4 Best Achievables Worst-case Guarantees on $\mathcal{C}_\Lambda$

This section discusses the (asymptotic) optimality of Algorithm 3. In Section 4.2, the polynomial  $P_t(\cdot; \sigma_K^\Lambda)$  was written as a composition of Chebyshev polynomials with  $\sigma_K^\Lambda$ , defined in (16). The best  $K$  is chosen as follows: we solve (16) for several values of  $K$ , then pick the smallest  $K$  among the minimizers of (15). However, following such steps does not guarantee that the polynomial  $P_{t,K}^\Lambda$  is *minimax*, as it is not guaranteed to minimize the worst-case rate  $\sup_{\lambda \in \Lambda} |P_t(\lambda)|$  (see (11)).

We give here an optimality certificate, linked to a generalized version of *equioscillation*. In short, if we can find  $K$  non overlapping intervals (more formally, whose interiors are disjoint)  $\Lambda_i$  in  $\Lambda$  such that  $\sigma_K^\Lambda(\Lambda_i) = [-1, 1]$  then  $P_{t,K}^\Lambda$  is minimax for all  $t = nK$ ,  $n \in \mathbb{N}_0^+$ . The detailed result is provided by Theorem C.2. A direct consequence of this result is the asymptotic optimality of Algorithm 3, i.e., there exists no first order algorithm with a better asymptotic rate  $1 - \tau$  for the function class  $\mathcal{C}_\Lambda$ .

It is possible that such  $\sigma_K^\Lambda$  does not exist for a given  $\Lambda$ . A complete characterization of the set  $\Lambda$  for which there exists such  $\sigma_K^\Lambda$  is out of the scope of this paper. A partial answer is given in [Fischer, 2011] when  $\Lambda$  is the union of two intervals. However, the problem remains open in the general case.

### 5 Local Convergence for Non-Quadratic Functions

When  $f$  is twice-differentiable, it is possible to show local convergence rates when  $x_0$  is close enough to  $x_*$  [Polyak, 1964]. We give here a similar result that applies to Algorithm 1 (see proof in Appendix E). Those results are only local, as it is possible to find pathological counter-examples for which even PHB does not converge globally, for some specific initialization [Lessard et al., 2016].

**Theorem 5.1** (Local convergence). *Let  $f : \mathbb{R}^d \mapsto \mathbb{R}$  be a (potentially non-quadratic) twice continuously differentiable function,  $x_*$  a local minimizer, and  $H$  be the Hessian of  $f$  at  $x_*$  with  $\text{Sp}(H) \subseteq \Lambda$ . Let  $x_t$  denote the result of running Algorithm 1 with parameters  $h_1, h_2, \dots, h_K, m$ , and let  $1 - \tau$  be the linear convergence rate on the quadratic objective (OPT). Then we have*

$$\forall \varepsilon > 0, \exists \text{ open set } V_\varepsilon : x_0, x_* \in V_\varepsilon \implies \|x_t - x_*\| = O((1 - \tau + \varepsilon)^t) \|x_0 - x_*\|. \quad (24)$$

In short, when Algorithm 1 is guaranteed to converge at rate  $1 - \tau$  on (OPT), then the convergence rate on a nonlinear functions can be arbitrary close to  $1 - \tau$  when  $x_0$  is sufficiently close to  $x_*$ .

### 6 Experiments

In this section we present an empirical comparison of the cyclical heavy ball method for different length cycles across 4 different problems. We consider two different problems, quadratic and logistic regression, each applied on two datasets, the MNIST handwritten digits [Le Cun et al., 2010] and a synthetic dataset. The results of these experiments, together with a histogram of the Hessian's eigenvalues are presented in Figure 4 (see caption for a discussion).

**Dataset description.** The MNIST dataset consists of a data matrix  $A$  with 60000 images of handwritten digits each one with  $28 \times 28 = 784$  pixels. The *synthetic* dataset is generated according to a spiked covariance model [Johnstone, 2001], which has been shown to be an accurate model of covariance matrices arising for instance in spectral clustering [Couillet and Benaych-Georges, 2016] and deep networks [Pennington and Worah, 2017, Granzio et al., 2020]. In this model, the data matrix  $A = XZ$  is generated from a  $m \times n$  random Gaussian matrix  $X$  and an  $m \times m$  deterministic matrix  $Z$ . In our case, we take  $n = 1000$ ,  $m = 1200$  and  $Z$  is the identity where the first three entries are multiplied by 100 (this will lead to three outlier eigenvalues). We also generate an  $n$ -dimensional target vector  $b$  as  $b = Ax$  or  $b = \text{sign}(Ax)$  for the quadratic and logistic problem respectively.

**Objective function** For each dataset, we consider a quadratic and a logistic regression problem, leading to 4 different problems. All problems are of the form  $\min_{x \in \mathbb{R}^p} \frac{1}{n} \sum_{i=1}^n \ell(A_i^\top x, b_i) + \lambda \|x\|^2$ , where  $\ell$  is a quadratic or logistic loss,  $A$  is the data matrix and  $b$  are the target values. We set the regularization parameter to  $\lambda = 10^{-3} \|A\|^2$ . For logistic regression, since guarantees only hold at a neighborhood of the solution (even for the 1-cycle algorithm), we initialize the first iterate as the result of 100 iteration of gradient descent. In the case of logistic regression, the Hessian eigenvalues are computed at the optimum.



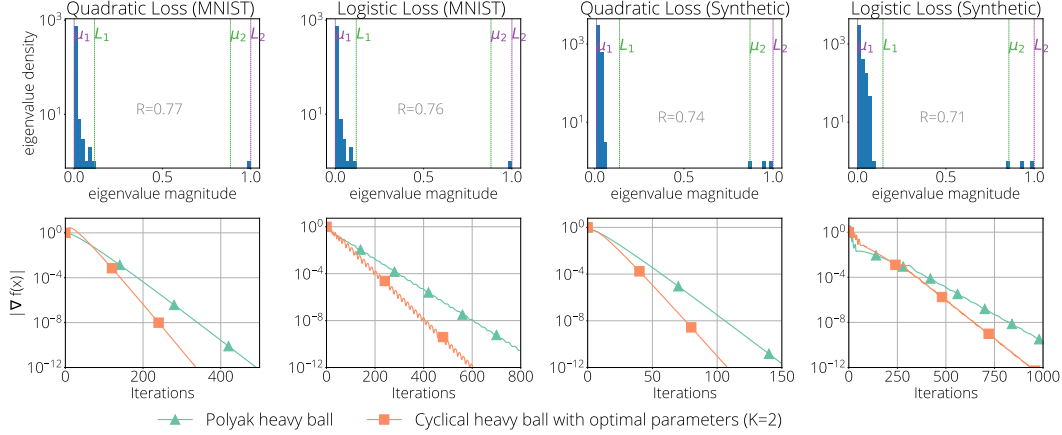

Figure 4: *Hessian Eigenvalue histogram (top row) and Benchmarks (bottom row)*. The **top row** shows the Hessian eigenvalue histogram at optimum for the 4 problems consider, together with the interval boundaries  $\mu_1 < L_1 < \mu_2 < L_2$  for the two-interval split of the eigenvalue support described in Section 3. In all cases, there’s a non-zero gap radius  $R$ . This is shown in the **bottom row**, where we compare the suboptimality in terms of gradient norm as a function of the number of iterations. As predicted by the theory, the non-zero gap radius translates into a faster convergence of the cyclical approach, compared to PHB in all cases. The improvement is observed on both quadratic and logistic regression problems, even through the theory for the latter is limited to *local* convergence.

## 7 Conclusion

This work is motivated by two recent observations from the optimization practice of machine learning. First, cyclical step-sizes have been shown to enjoy excellent empirical convergence [Loshchilov and Hutter, 2017, Smith, 2017]. Second, *spectral gaps* are pervasive in the Hessian spectrum of deep learning models [Sagun et al., 2017, Pappayan, 2018, Ghorbani et al., 2019, Pappayan, 2019]. Based on the simpler context of quadratic convex minimization, we develop a convergence-rate analysis and optimal parameters for the heavy ball method with cyclical step-sizes. This analysis highlights the regimes under which cyclical step-sizes have faster rates than classical accelerated methods. Finally, we illustrate these findings through numerical benchmarks.

**Main Limitations.** In Section 3 we gave explicit formulas for the optimal parameters in the case of the 2-cycle heavy ball algorithm. These formulas depend not only on extremal eigenvalues—as is usual for accelerated methods—but also on the spectral gap  $R$ . The gap can sometimes be computed after computed the top eigenvalues (e.g. top-2 eigenvalue for MNIST). However, in general, there is no guarantee on how many eigenvalues are needed to estimate it. Moreover, global convergence result rely heavily on the quadratic assumption.

Another limitation regards long cycles. For cycles longer than 2, we have only given an implicit formula to set the optimal parameters (Proposition 4.9). This involves solving a set of non-linear equations whose complexity increases with the cycle length. That being said, cyclical step-sizes might significantly enhance convergence speeds both in terms of worst-case rates and empirically, and this work advocates that new tuning practices involving different cycle lengths might be relevant.

**Broader Impact.** This work is mostly theoretical, and as such we believe it does not present direct societal consequences. However, the methods described in this paper can be used to train machine learning models which could themselves have societal consequences. For example, the deployment of machine learning models in decision-making has been shown to suffer from gender and racial bias and to amplify existing inequalities, see for instance [Hutchinson and Mitchell, 2019, Barocas et al., 2017, Obermeyer et al., 2019].

## References

- Solon Barocas, Moritz Hardt, and Arvind Narayanan. [Fairness in machine learning](#). *Nips tutorial*, 2017.
- Dimitri P. Bertsekas. [Nonlinear programming](#). *Journal of the Operational Research Society*, 1997.
- Pafnuty Lvovich Chebyshev. [Théorie des mécanismes connus sous le nom de parallélogrammes](#). Imprimerie de l’Académie impériale des sciences, 1853.
- Romain Couillet and Florent Benaych-Georges. [Kernel spectral clustering of large dimensional data](#). *Electronic Journal of Statistics*, 2016.
- Bernd Fischer. [Polynomial based iteration methods for symmetric linear systems](#). SIAM, 2011.
- Donald A. Flanders and George Shortley. [Numerical determination of fundamental modes](#). *Journal of Applied Physics*, 1950.
- Behrooz Ghorbani, Shankar Krishnan, and Ying Xiao. [An investigation into neural net optimization via hessian eigenvalue density](#). In *International Conference on Machine Learning (ICML)*, 2019.
- Gabriel Goh. [Why Momentum Really Works](#), 2017. URL <http://distill.pub/2017/momentum/>.
- Gene H. Golub and Richard S. Varga. [Chebyshev semi-iterative methods, successive overrelaxation iterative methods, and second order Richardson iterative methods](#). *Numerische Mathematik*, 1961.
- Diego Granzio, Xingchen Wan, Samuel Albanie, and Stephen Roberts. [Explaining the Adaptive Generalisation Gap](#). *arXiv preprint arXiv:2011.08181*, 2020.
- Magnus R. Hestenes and Eduard Stiefel. [Methods of conjugate gradients for solving linear systems](#), volume 49. NBS Washington, DC, 1952.
- Ben Hutchinson and Margaret Mitchell. [50 years of test \(un\) fairness: Lessons for machine learning](#). In *Proceedings of the Conference on Fairness, Accountability, and Transparency*, 2019.
- Iain M. Johnstone. [On the distribution of the largest eigenvalue in principal components analysis](#). *Annals of statistics*, 2001.
- Yann Le Cun, Corinna Cortes, and Chris Burges. [MNIST handwritten digit database](#). *ATT Labs [Online]*, 2010.
- Laurent Lessard, Benjamin Recht, and Andrew Packard. [Analysis and design of optimization algorithms via integral quadratic constraints](#). *SIAM Journal on Optimization*, 2016.
- Ilya Loshchilov and Frank Hutter. [SGDR: stochastic gradient descent with warm restarts](#). In *International Conference on Learning Representations (ICLR)*, 2017.
- Arkadi S. Nemirovsky. [Information-based complexity of linear operator equations](#). *Journal of Complexity*, 1992.
- Arkadi S. Nemirovsky. [Information-based complexity of convex programming](#). *Lecture Notes*, 1995.
- Yurii Nesterov. [Introductory Lectures on Convex Optimization](#). Springer, 2003.
- Ziad Obermeyer, Brian Powers, Christine Vogeli, and Sendhil Mullainathan. [Dissecting racial bias in an algorithm used to manage the health of populations](#). *Science*, 2019.
- Vardan Papyan. [The full spectrum of deepnet Hessians at scale: Dynamics with SGD training and sample size](#). *arXiv preprint arXiv:1811.07062*, 2018.
- Vardan Papyan. [Measurements of Three-Level Hierarchical Structure in the Outliers in the Spectrum of Deepnet Hessians](#). In *International Conference on Machine Learning (ICML)*, 2019.
- Fabian Pedregosa. [On the Link Between Optimization and Polynomials, Part 1](#), 2020. URL <http://fa.bianp.net/blog/2020/polyopt/>.
- Fabian Pedregosa. [On the Link Between Optimization and Polynomials, Part 3](#), 2021. URL <http://fa.bianp.net/blog/2021/hitchhiker/>.
- Jeffrey Pennington and Pratik Worah. [Nonlinear random matrix theory for deep learning](#). In *Advances on Neural Information Processing Systems (NIPS)*, 2017.
- Boris T. Polyak. [Some methods of speeding up the convergence of iteration methods](#). *USSR computational mathematics and mathematical physics*, 1964.

- 304 Heinz Rutishauser. [Theory of gradient methods](#). In *Refined iterative methods for computation of the*  
305 *solution and the eigenvalues of self-adjoint boundary value problems*. Springer, 1959.
- 306 Levent Sagun, Utku Evci, V. Ugur Guney, Yann Dauphin, and Leon Bottou. [Empirical analysis of the](#)  
307 [Hessian of over-parametrized neural networks](#). *arXiv preprint arXiv:1706.04454*, 2017.
- 308 Damien Scieur and Fabian Pedregosa. [Universal Asymptotic Optimality of Polyak Momentum](#). In  
309 *International Conference on Machine Learning (ICML)*, 2020.
- 310 Leslie N. Smith. [Cyclical learning rates for training neural networks](#). In *2017 IEEE Winter Conference*  
311 *on Applications of Computer Vision (WACV)*. IEEE, 2017.
- 312 Ilya Sutskever, James Martens, George Dahl, and Geoffrey Hinton. [On the importance of initialization](#)  
313 [and momentum in deep learning](#). In *International Conference on Machine Learning (ICML)*, 2013.

## Checklist

### 1. For all authors...

- (a) Do the main claims made in the abstract and introduction accurately reflect the paper's contributions and scope? [Yes] The Introduction (Section 1) details where all results can be found.
- (b) Did you describe the limitations of your work? [Yes] There is a paragraph "Main Limitations" in the Conclusion (Section 7).
- (c) Did you discuss any potential negative societal impacts of your work? [N/A] As stated in the "Broader Impact" section, this work is mostly theoretical and as such we believe it doesn't present a direct societal impact.
- (d) Have you read the ethics review guidelines and ensured that your paper conforms to them? [Yes]

### 2. If you are including theoretical results...

- (a) Did you state the full set of assumptions of all theoretical results? [Yes] In each and every statement we make.
- (b) Did you include complete proofs of all theoretical results? [Yes] All proofs are available in the supplementary material.

### 3. If you ran experiments...

- (a) Did you include the code, data, and instructions needed to reproduce the main experimental results (either in the supplemental material or as a URL)? [Yes] URLs are provided in the supplementary material.
- (b) Did you specify all the training details (e.g., data splits, hyperparameters, how they were chosen)? [Yes] In the experiments section (Section 6).
- (c) Did you report error bars (e.g., with respect to the random seed after running experiments multiple times)? [No] .
- (d) Did you include the total amount of compute and the type of resources used (e.g., type of GPUs, internal cluster, or cloud provider)? [Yes] , in Appendix F

### 4. If you are using existing assets (e.g., code, data, models) or curating/releasing new assets...

- (a) If your work uses existing assets, did you cite the creators? [Yes] In the "Dataset description" paragraph of the Experiments section 6.
- (b) Did you mention the license of the assets? [N/A]
- (c) Did you include any new assets either in the supplemental material or as a URL? [N/A] There is no new asset. We used MNIST existing Dataset as well as a synthetic dataset whose construction is described in papers cited in the Experiments section 6.
- (d) Did you discuss whether and how consent was obtained from people whose data you're using/curating? [N/A]
- (e) Did you discuss whether the data you are using/curating contains personally identifiable information or offensive content? [N/A]

### 5. If you used crowdsourcing or conducted research with human subjects...

- (a) Did you include the full text of instructions given to participants and screenshots, if applicable? [N/A]
- (b) Did you describe any potential participant risks, with links to Institutional Review Board (IRB) approvals, if applicable? [N/A]
- (c) Did you include the estimated hourly wage paid to participants and the total amount spent on participant compensation? [N/A]

## Organization of the appendix

The appendix contains all proofs that were not presented in the main core of the paper. We also detail all examples, and provide some complementary elements.

Appendix A details the existing link between first order methods and family of “residual polynomials”. This term refers in all the appendix to the polynomials which value in 0 is 1.

In Appendix B, we recall some well known optimal methods for  $L$ -smooth  $\mu$ -strongly convex quadratic minimization (i.e., when the spectrum is contained in a single interval  $\Lambda = [\mu, L]$ ). Its purpose is exclusively to recall well-known foundation of optimization that are those algorithms and their construction.

In Appendix C, we recall the polynomial formulation of the optimal method design problem, as well as a fundamental property, called “equioscillation”, to characterize the solution of this problem.

In Appendix D, we provide all proofs related to cyclic step sizes. In particular,

- In Appendix D.1, we derive the optimal algorithm in a case where  $\Lambda$  is the union of 2 intervals of the same size (See (3)). This leads to the use of alternating step-sizes. The resulting algorithm has a stationary form which is Algorithm 1.
- Therefore, in Appendix D.2, we study the heavy ball with cycling step sizes (Algorithm 1).
- In Appendix D.3 and Appendix D.4, we use our results to design methods with cycles of lengths  $K = 2$  and  $K = 3$ . For those cases, we provide a more elegant formulation of the results.

In Appendix E, we provide a proof of Theorem 5.1 (local behavior beyond quadratics).

Finally, in Appendix F, we provide some information about the code we used for the experiments.

## Contents

|                                                                                   |           |
|-----------------------------------------------------------------------------------|-----------|
| <b>A Relationship between first order methods and polynomials</b>                 | <b>13</b> |
| <b>B Optimal methods for strongly convex and smooth quadratic objective</b>       | <b>15</b> |
| B.1 Chebyshev semi-iterative method . . . . .                                     | 16        |
| B.2 Polyak heavy ball method . . . . .                                            | 17        |
| <b>C Minimax Polynomials and Equioscillation Property</b>                         | <b>18</b> |
| <b>D Cycling step-sizes</b>                                                       | <b>22</b> |
| D.1 Derivation of optimal algorithm with $K = 2$ alternating step sizes . . . . . | 22        |
| D.2 Derivation of heavy ball with $K$ step sizes cycle . . . . .                  | 25        |
| D.3 Example: alternating step sizes ( $K = 2$ ) . . . . .                         | 29        |
| D.4 Example: 3 cycling step sizes . . . . .                                       | 34        |
| <b>E Beyond quadratic objective: local convergence of cycling methods</b>         | <b>37</b> |
| <b>F Experimental setup</b>                                                       | <b>38</b> |

## A Relationship between first order methods and polynomials

In this section we prove some results on the relationship between polynomials and first order methods for quadratic minimization, which is the starting point for our theoretical framework. This relationship is classical and was exploited by Rutishauser [1959], Nemirovsky [1992, 1995]), to name a few. The following proposition makes this relationship precise:

**Proposition 4.1.** *Let  $f \in \mathcal{C}_\Lambda$ . The iterates  $x_t$  satisfy*

$$x_{t+1} \in x_0 + \text{span}\{\nabla f(x_0), \dots, \nabla f(x_t)\}, \quad (8)$$

where  $x_0$  is the initial approximation of  $x_*$ , if and only if there exists a sequence of polynomials  $(P_t)_{t \in \mathbb{N}}$ , each of degree at most 1 more than the highest degree of all previous polynomials and  $P_0$  of

401 degree 0 (hence the degree of  $P_t$  is at most  $t$ ), such that

$$\forall t \quad x_t - x_* = P_t(H)(x_0 - x_*), \quad P_t(0) = 1. \quad (9)$$

402 *Proof.* We successively prove both directions of the equivalence.

403 ( $\implies$ ) Given a first order method, we can find a sequence of polynomials  $(P_t)_{t \in \mathbb{N}}$  such that, for a  
404 given quadratic function  $f$  of Hessian  $H$  and a given starting point  $x_0$ , the iterates  $x_t$  verify

$$x_t - x_* = P_t(H)(x_0 - x_*).$$

405 Moreover, The polynomials sequence  $(P_t)_{t \in \mathbb{N}}$  verifies the relations

$$\deg(P_{t+1}) \leq \max_{k \leq t} \deg(P_k) + 1 \quad \text{and} \quad P_t(0) = 1.$$

406

407 We proceed by induction:

408 **Initial case.** Let  $t = 0$ . Then for any first order method we have the trivial relationship

$$x_0 - x_* = P_0(H)(x_0 - x_*) \quad \text{with} \quad P_0 = 1.$$

409 This proves the implication for  $t = 0$ , as  $P_0$  is a degree 0 polynomial satisfying  $P_0(0) = 1$ .

410 **Recursion.** Let  $t \in \mathbb{N}$ . We assume the following statement true,

$$\forall k \leq t, \quad x_k - x_* = P_k(H)(x_0 - x_*) \quad \text{with} \quad P_k(0) = 1.$$

411 We now prove this statement is also true for  $t + 1$ . Since  $x_{t+1} \in x_0 + \text{span}\{\nabla f(x_0), \dots, \nabla f(x_t)\}$ ,  
412 there exists a family  $(\gamma_{t+1,k})_{k \in \llbracket 0, t \rrbracket}$  such that

$$x_{t+1} = x_0 - \gamma_{t+1,0} \nabla f(x_0) - \dots - \gamma_{t+1,t} \nabla f(x_t). \quad (25)$$

413 Then, by the induction hypothesis we have:

$$\begin{aligned} x_{t+1} - x_* &= x_0 - x_* - \gamma_{t+1,0} H(x_0 - x_*) - \dots - \gamma_{t+1,t} H(x_t - x_*) \\ &= x_0 - x_* - \gamma_{t+1,0} H P_0(H)(x_0 - x_*) - \dots - \gamma_{t+1,t} H P_t(H)(x_0 - x_*) \\ &\triangleq P_{t+1}(H)(x_0 - x_*). \end{aligned}$$

414 We observe that the latest polynomial has a degree at most 1 plus the highest degree of  $(P_k)_{k \leq t}$  and  
415 that  $P_{t+1}(0) = 1$  (since  $P_{t+1}$  is defined as 1 plus some polynomial multiple of the polynomial  $X$ ),  
416 which concludes the proof.

417 ( $\Leftarrow$ ): From a family of polynomials  $(P_t)_{t \in \mathbb{N}}$ , with

$$\deg(P_{t+1}) \leq \max_{k \leq t} \deg(P_k) + 1 \quad \text{and} \quad P_t(0) = 1, \quad (26)$$

418 we can obtain a first order method such that, for any quadratic  $f$  (and its Hessian  $H$ ) and any  
419 starting point  $x_0$ , we verify

$$\forall t \in \mathbb{N}, x_t - x_* = P_t(H)(x_0 - x_*).$$

420

421 Let the sequence  $(P_t)_{t \in \mathbb{N}}$  verifies (26) for all  $t \in \mathbb{N}$ . Let

$$d = \max_{t' \leq t} \deg(P_{t'}).$$

422 A gap in the sequence of degrees would stand in contradiction with our assumptions.

423 Since, there is no gap in degree, for any  $d' \leq d$  there exists  $t' \leq t$  such that  $\deg(P_{t'}) = d'$ , and  
424 therefore  $\text{Span}((P_k)_{k \leq t}) = \mathbb{R}_d[X]$ .

425 Moreover, we know  $P_{t+1}$  has a degree at most  $d + 1$  and  $P_{t+1}(0) = 1$ , so  $\frac{1 - P_{t+1}(X)}{X} \in \mathbb{R}_d[X]$ .



426 This proves the existence of  $(\gamma_{t+1,k})_{k \in \llbracket 0, t \rrbracket}$  such that

$$\frac{1 - P_{t+1}(X)}{X} = \gamma_{t+1,0}P_0(X) + \cdots + \gamma_{t+1,t}P_t(X). \quad (27)$$

427 Then, defining

$$x_{t+1} = x_0 - \gamma_{t+1,0}\nabla f(x_0) - \cdots - \gamma_{t+1,t}\nabla f(x_t), \quad (28)$$

428 we have

$$x_{t+1} - x_* = x_0 - x_* - H(\gamma_{t+1,0}(x_0 - x_*) + \cdots + \gamma_{t+1,t}(x_t - x_*)) \quad (29)$$

$$= (1 - X(\gamma_{t+1,0}P_0(X) + \cdots + \gamma_{t+1,t}P_t(X)))(H)(x_0 - x_*) \quad (30)$$

$$= P_{t+1}(H)(x_0 - x_*). \quad (31)$$

429 Defining  $x_t$  for all  $t$  according to (28) gives an algorithm that has as associated residual polynomials  
430  $(P_t)_{t \in \mathbb{N}}$ .  $\square$

431 The above proposition can be used to obtain worst-case rates for first order methods by bounding  
432 their associated polynomials. Indeed, using the Cauchy-Schwartz inequality in (9) leads to

$$\|x_t - x_*\| \leq \sup_{\lambda \in \Lambda} |P_t(\lambda)| \|x_0 - x_*\| \implies r_t = \sup_{\lambda \in \Lambda} |P_t(\lambda)|, \quad \text{where } P(0) = 1. \quad (32)$$

433 Therefore, finding the algorithm with the fastest worst-case rate can be equivalently framed as the  
434 problem of finding the residual polynomial with smallest value on the eigenvalue support  $\Lambda$ .

435 Then, finding the fastest algorithm is equivalent of finding, for each  $t \geq 0$ , the polynomial of degree  $t$   
436 that reaches the smallest infinite norm on the set  $\Lambda$ . Therefore we introduce the notion of *minimax*  
437 *polynomial* (Definition A.1) over a set  $\Lambda$  as the one that reaches the smallest maximal value over  $\Lambda$   
438 among a set of polynomial of fixed degree and  $P(0) = 1$ .

439 **Definition A.1** (Minimax polynomial of degree  $t$  over  $\Lambda$ ). For any,  $t \geq 0$ , and any relatively compact  
440 (i.e. bounded) set  $\Lambda \subset \mathbb{R}$ , the *minimax polynomial of degree  $t$  over  $\Lambda$* , written  $Z_t^\Lambda$ , is defined as

$$Z_t^\Lambda \triangleq \operatorname{argmin}_{P \in \mathbb{R}_t[X]} \sup_{\lambda \in \Lambda} |P(\lambda)|, \quad \text{subject to } P(0) = 1. \quad (33)$$

## 441 B Optimal methods for strongly convex and smooth quadratic objective

442 In this section, for sake of completeness, we revisit some classical methods, described in e.g. [Polyak,  
443 1964, Goh, 2017, Pedregosa, 2020, 2021], that are optimal when the Hessian eigenvalues are contained  
444 in a single interval of the form  $\Lambda = [\mu, L]$ . To make this setup explicit, we will denote the optimal  
445 polynomials  $\sigma_1^\Lambda$  and  $Z_t^\Lambda$  (respectively defined in Equation (16) and Equation (33)) by  $\sigma_1^{[\mu, L]}$ , and  
446  $Z_t^{[\mu, L]}$ .

447 As mentioned in Example 4.4, the minimax polynomial  $Z_t^{[\mu, L]}$  is

$$Z_t^{[\mu, L]}(\lambda) = \frac{T_t(\sigma_1^{[\mu, L]}(\lambda))}{T_t(\sigma_1^{[\mu, L]}(0))},$$

448 where  $T_t$  denotes the  $t^{\text{th}}$  Chebyshev polynomial (See e.g. Chebyshev [1853]) and  $\sigma_1^{[\mu, L]}$  the affine  
449 function  $\lambda \mapsto \frac{L+\mu}{L-\mu} - \frac{2}{L-\mu}\lambda$  that maps  $[\mu, L]$  onto  $[-1, 1]$ . This can be seen a consequence of the  
450 more general *equioscillation* discussed in Appendix C. The next section presents one method which  
451 has  $Z_t^{[\mu, L]}$  as associated residual polynomial. This method is known as the Chebyshev semi-iterative  
452 method.

## 453 B.1 Chebyshev semi-iterative method

454 The algorithm follows the three terms pattern from Equation (13) to iteratively form  $Z_1^\Lambda, \dots, Z_t^\Lambda$ .

---

**Algorithm 4:** Chebyshev semi-iterative method [Golub and Varga, 1961]

---

**Input:**  $x_0$

**Initialize:**  $\omega_0 = 2$

$x_1 = x_0 - \frac{2}{L+\mu} \nabla f(x_0);$

455

**for**  $t = 1, \dots$  **do**

$\omega_{t+1} = \frac{1}{1 - \frac{1}{4} \left( \frac{1-\kappa}{1+\kappa} \right)^2 \omega_t};$

$x_{t+1} = x_t - \frac{2}{L+\mu} \omega_t \nabla f(x_t) + (\omega_t - 1)(x_t - x_{t-1});$

**end**

---

456 **Theorem B.1.** *The iterates produced by the Chebyshev semi-iterative method verify*

$$x_t - x_* = \frac{T_t(\sigma_1^{[\mu,L]}(H))}{T_t(\sigma_1^{[\mu,L]}(0))} (x_0 - x_*) \quad \text{for all } t \in \mathbb{N}. \quad (34)$$

457 Furthermore, this method enjoys a worst-case rate of the form

$$\|x_t - x_*\| \leq \frac{1}{T_t(\sigma_1^{[\mu,L]}(0))} \|x_0 - x_*\| = O\left(\left(\frac{1 - \sqrt{\kappa}}{1 + \sqrt{\kappa}}\right)^t\right). \quad (35)$$

458 *Proof.* Consider first an algorithm whose iterates verify (34). Then using the Cauchy-Schwartz  
459 inequality and known bounds of Chebyshev polynomials, we can show the following rate

$$\begin{aligned} \|x_t - x_*\| &\leq \frac{\sup_{\lambda \in [\mu, L]} |T_t(\sigma_1^{[\mu,L]}(\lambda))|}{T_t(\sigma_1^{[\mu,L]}(0))} \|x_0 - x_*\| \\ &= \frac{1}{T_t\left(\frac{1+\kappa}{1-\kappa}\right)} \|x_0 - x_*\| \quad \text{since } \sup_{x \in [-1, 1]} |T_t(x)| = 1 \\ &\leq 2 \left(\frac{1 - \sqrt{\kappa}}{1 + \sqrt{\kappa}}\right)^t \|x_0 - x_*\| \quad \text{since } T_t(x) \geq \frac{(x + \sqrt{x^2 - 1})^t}{2}, \forall x \notin (-1, 1). \end{aligned}$$

460 It remains to prove that Algorithm 4 is the one that achieves the property (34). Using the recursion  
461 verified by Chebyshev polynomials

$$T_{t+1}(x) = 2xT_t(x) - T_{t-1}(x), \quad (36)$$

462 we have

$$\begin{aligned} x_{t+1} - x_* &= \frac{T_{t+1}(\sigma_1^{[\mu,L]}(H))}{T_{t+1}(\sigma_1^{[\mu,L]}(0))} (x_0 - x_*) \\ &= \frac{2\sigma_1^{[\mu,L]}(H)T_t(\sigma_1^{[\mu,L]}(H))(x_0 - x_*) - T_{t-1}(\sigma_1^{[\mu,L]}(H))(x_0 - x_*)}{T_{t+1}(\sigma_1^{[\mu,L]}(0))} \\ &= \frac{2\sigma_1^{[\mu,L]}(H)T_t(\sigma_1^{[\mu,L]}(0))}{T_{t+1}(\sigma_1^{[\mu,L]}(0))} (x_t - x_*) - \frac{T_{t-1}(\sigma_1^{[\mu,L]}(0))}{T_{t+1}(\sigma_1^{[\mu,L]}(0))} (x_{t-1} - x_*) \\ &= \frac{2\sigma_1^{[\mu,L]}(0)T_t(\sigma_1^{[\mu,L]}(0))}{T_{t+1}(\sigma_1^{[\mu,L]}(0))} \left(I - \frac{2}{L+\mu}H\right) (x_t - x_*) - \frac{T_{t-1}(\sigma_1^{[\mu,L]}(0))}{T_{t+1}(\sigma_1^{[\mu,L]}(0))} (x_{t-1} - x_*). \end{aligned}$$

463 Let's introduce  $\omega_t \triangleq \frac{2\sigma_1^{[\mu,L]}(0)T_t(\sigma_1^{[\mu,L]}(0))}{T_{t+1}(\sigma_1^{[\mu,L]}(0))}$ . Then  $\omega_0 = 2$  and by Chebyshev recursion (Equation (36)),  
 464  $\omega_t - 1 = \frac{T_{t-1}(\sigma_1^{[\mu,L]}(0))}{T_{t+1}(\sigma_1^{[\mu,L]}(0))}$ . With this notation we can write the above identity more compactly as

$$\begin{aligned} x_{t+1} - x_* &= \omega_t \left( I - \frac{2}{L + \mu} H \right) (x_t - x_*) - (\omega_t - 1)(x_{t-1} - x_*) \\ &= x_t - \frac{2}{L + \mu} \omega_t \nabla f(x_t) + (\omega_t - 1)(x_t - x_{t-1}). \end{aligned}$$

465 It remains to find a recursion on  $\omega_t$  to make its use tractable. Using one more time the Chebyshev  
 466 recursion Equation (36),

$$\begin{aligned} \omega_t^{-1} &= \frac{T_{t+1}(\sigma_1^{[\mu,L]}(0))}{2\sigma_1^{[\mu,L]}(0)T_t(\sigma_1^{[\mu,L]}(0))} \\ &= \frac{2\sigma_1^{[\mu,L]}(0)T_t(\sigma_1^{[\mu,L]}(0)) - T_{t-1}(\sigma_1^{[\mu,L]}(0))}{2\sigma_1^{[\mu,L]}(0)T_t(\sigma_1^{[\mu,L]}(0))} \\ &= 1 - \frac{1}{4\sigma_1^{[\mu,L]}(0)^2} \frac{2\sigma_1^{[\mu,L]}(0)T_{t-1}(\sigma_1^{[\mu,L]}(0))}{T_t(\sigma_1^{[\mu,L]}(0))} \\ &= 1 - \frac{1}{4\sigma_1^{[\mu,L]}(0)^2} \omega_{t-1}, \end{aligned}$$

467 which can finally be written as

$$\omega_{t+1} = \frac{1}{1 - \frac{1}{4} \left( \frac{1-\kappa}{1+\kappa} \right)^2 \omega_t},$$

468 and we recognize the *Chebyshev semi-iterative method* described in Algorithm 4.  $\square$

469 This method, unlike the Polyak heavy ball (PHB) method, uses a different step-size and momentum  
 470 at each iteration. However, both are related, as taking the limit of  $\omega_t$  as  $t \rightarrow \infty$  in Algorithm 4 we  
 471 obtain  $\omega_\infty = 1 + m$  with  $m = \left( \frac{1-\sqrt{\kappa}}{1+\sqrt{\kappa}} \right)^2$ . This correspond to the parameters of PHB.

## 472 B.2 Polyak heavy ball method

---

**Algorithm 5:** Polyak Heavy ball

---

**Input:**  $x_0$

**Set:**  $m = \left( \frac{1-\sqrt{\kappa}}{1+\sqrt{\kappa}} \right)^2$  and  $h = \frac{2(1+m)}{L+\mu}$ .

473  $x_1 = x_0 - \frac{h}{1+m} \nabla f(x_0)$

**for**  $t = 1, \dots$  **do**

$x_{t+1} = x_t - h \nabla f(x_t) + m(x_t - x_{t-1})$

**end**

---

474 **Theorem B.2.** *The iterates of the heavy ball algorithm verify*

$$x_t - x_* = P_t(H)(x_0 - x_*) \quad \text{for all } t \in \mathbb{N},$$

475 with  $P_t$  defined as

$$P_t \triangleq (\sqrt{m})^t \left[ \frac{2m}{1+m} T_t(\sigma_1^{[\mu,L]}(\lambda)) + \frac{1-m}{1+m} U_t(\sigma_1^{[\mu,L]}(\lambda)) \right]. \quad (37)$$

476 Furthermore, this method enjoys a worst-case rate of the form

$$\|x_t - x_*\| = O \left( t \left( \frac{\sqrt{\kappa} - 1}{\sqrt{\kappa} + 1} \right)^t \right). \quad (38)$$

477 *Proof.* From the update defined in Algorithm 5, we identify

$$\begin{aligned} P_0(\lambda) &= 1 \\ P_1(\lambda) &= 1 - \frac{h}{1+m}\lambda \\ P_{t+1}(\lambda) &= (1+m-h\lambda)P_t(\lambda) - mP_{t-1}(\lambda). \end{aligned}$$

478 Introducing  $\tilde{P}_t \triangleq \frac{P_t}{(\sqrt{m})^t}$ , we have

$$\begin{aligned} \tilde{P}_0(\lambda) &= 1 \\ \tilde{P}_1(\lambda) &= \frac{1+m-h\lambda}{(1+m)\sqrt{m}} = \frac{2}{1+m}\sigma_1^{[\mu,L]}(\lambda) \\ \tilde{P}_{t+1}(\lambda) &= \frac{(1+m-h\lambda)}{\sqrt{m}}\tilde{P}_t(\lambda) - \tilde{P}_{t-1}(\lambda) \\ &= 2\sigma_1^{[\mu,L]}(\lambda)\tilde{P}_t(\lambda) - \tilde{P}_{t-1}(\lambda). \end{aligned}$$

479 This is a second order recurrence, with 2 initializations. It allows us to identify uniquely the family

$$\tilde{P}_t(\lambda) = \frac{2m}{1+m}T_t(\sigma_1^{[\mu,L]}(\lambda)) + \frac{1-m}{1+m}U_t(\sigma_1^{[\mu,L]}(\lambda)). \quad (39)$$

480 where  $U_t$  denotes the second order Tchebyshev polynomial of degree  $t$ . While both  $T_t$  and  $U_t$  verify  
481 the same recursion as  $\tilde{P}_t$  and  $T_0 = U_0 = \tilde{P}_0 = 1$ , the difference between  $T$  and  $U$  comes when  
482  $T_1(X) = X$  and  $U_1(X) = 2X$ . This is how  $\tilde{P}_t$  ends being a linear combination of the  $T_t$  and  $U_t$ .  
483 Finally,

$$P_t(\lambda) = (\sqrt{m})^t \left[ \frac{2m}{1+m}T_t(\sigma_1^{[\mu,L]}(\lambda)) + \frac{1-m}{1+m}U_t(\sigma_1^{[\mu,L]}(\lambda)) \right]. \quad (40)$$

484 Since by definition  $\sigma_1^{[\mu,L]}([\mu, L]) = [-1, 1]$ ,  $T_t(\sigma_1^{[\mu,L]}(\lambda)) \leq 1$  and  $U_t(\sigma_1^{[\mu,L]}(\lambda)) \leq t+1, \forall t \in \mathbb{N}$ .  
485 Hence,  $\forall \lambda \in [\mu, L]$ ,

$$P_t(\lambda) \leq (\sqrt{m})^t \left[ 1 + \frac{1-m}{1+m}t \right] \leq (2\sqrt{\kappa}t + 1) \left( \frac{1-\sqrt{\kappa}}{1+\sqrt{\kappa}} \right)^t \quad (41)$$

486 and

$$\|x_t - x_*\| = O \left( t \left( \frac{\sqrt{\kappa}-1}{\sqrt{\kappa}+1} \right)^t \right). \quad (42)$$

487

□

## 488 C Minimax Polynomials and Equioscillation Property

489 Appendix B dealt with optimal methods when  $\Lambda = [\mu, L]$ . Those methods could be derived since the  
490 minimax polynomial (Definition A.1)  $Z_t^{[\mu,L]}$  is known.

491 In this section we consider the problem of finding minimax polynomials in a more general setting.  
492 We provide a characterization of the minimax polynomial defined in definition A.1. For the sake of  
493 simplicity, we actually focus on the polynomial  $\sigma_t^\Lambda$  solution of (16). We can easily adapt the result to  
494  $Z_t^\Lambda$  leveraging Remark 4.7. We prove the following theorem.

495 **Theorem C.1.** *Let  $P_t$  be a degree  $t$  polynomial verifying  $P_t(\Lambda) \subset [-1, 1]$ . Then  $P_t$  is the unique  
496 solution  $\sigma_t^\Lambda$  of eq. (16) if and only if there exists a sorted family  $(\lambda_i)_{i \in \llbracket 0, t \rrbracket} \in (\overline{\Lambda})^{t+1}$  (where  $\overline{\Lambda}$  is the  
497 closure of  $\Lambda$ ) such that  $\forall i \in \llbracket 0, t \rrbracket, P_t(\lambda_i) = (-1)^i$ .*

498 The following proof is technical and requires to introduce several new notations. Hence we first  
499 briefly describe the intuition before giving the actual complete proof.

500 ( $\Leftarrow$ ): Assume  $P_t$  “oscillates”  $t+1$  times between 1 and  $-1$ . Since  $P_t$  has a degree  $t$ , it is completely  
501 determined by its values on those  $t+1$  points, using the Lagrange interpolation representation. We

502 prove that  $P_t$  is optimal because any other polynomial  $Q_t$ , having different values on those  $t + 1$   
 503 points would achieve a smaller value  $Q_t(0)$  at 0.

504 ( $\implies$ ): We use a proof by contraposition. We assume that  $P_t$  doesn't oscillate  $t + 1$  times between 1  
 505 and  $-1$ , and prove that  $P_t(0)$  is not optimal. To do so, we build a small perturbation  $\varepsilon Q_t$  such that  
 506  $P_t + \varepsilon Q_t$  is a polynomial of degree  $t$ , which values on  $\Lambda$  are all in  $[-1; 1]$ , and with an higher value  
 507 at 0.

508 (Uniqueness) We reuse the Lagrange interpolation representation to justify that 2 optimal polynomials  
 509 must "oscillate" on the same points, therefore are equal.

510 *Proof.* We prove successively both directions:

511 ( $\Leftarrow$ ): Assume  $\exists \lambda_0 < \lambda_1 < \dots < \lambda_t$  such that

$$\forall i \in \llbracket 0, t \rrbracket, P_t(\lambda_i) = (-1)^i \quad \text{and} \quad P_t(\Lambda) \subset [-1, 1]. \quad (43)$$

512 We aim to prove that  $P_t$  is the unique solution  $\sigma_t^\Lambda$  of eq. (16), that is for any other polynomial  $Q_t$  of  
 513 degree  $t$  verifying  $Q_t(\Lambda) \subset [-1, 1]$ ,  $P_t(0) \geq Q_t(0)$ .

514 We introduce such a polynomial  $Q_t$  of degree  $t$  and bounded in absolute value by 1 on  $\Lambda$ . Let's define,  
 515 for all  $i \in \llbracket 0, t \rrbracket$ ,

$$v_i \triangleq Q_t(\lambda_i) \in [-1, 1]. \quad (44)$$

516 These  $t + 1$  values characterize  $Q_t$  (of degree  $t$ ), and we can decompose it over Lagrange interpolation  
 517 polynomials. We have

$$Q_t = \sum_{i=0}^t v_i L_{\lambda_i} \quad \text{where} \quad L_{\lambda_i}(X) \triangleq \prod_{j \neq i} \frac{X - \lambda_j}{\lambda_i - \lambda_j}. \quad (45)$$

518 The value at 0 can be computed as

$$Q_t(0) = \sum_{i=0}^t v_i L_{\lambda_i}(0) = \sum_{i=0}^t v_i \prod_{j \neq i} \frac{\lambda_j}{\lambda_j - \lambda_i}. \quad (46)$$

519 Maximizing this linear function of  $(v_i)_{i \in \llbracket 0, t \rrbracket}$  over the  $l_\infty$  ball  $B_\infty(1) \triangleq \{(v_i)_{i \in \llbracket 0, t \rrbracket}, \forall i, -1 \leq v_i \leq$   
 520  $1\}$  leads to, for  $v^* \triangleq \arg \min_{v \in B_\infty(1)} \sum_{i=0}^t v_i \prod_{j \neq i} \frac{\lambda_j}{\lambda_j - \lambda_i}$ ,

$$v_i^* = \operatorname{sgn} \left( \prod_{j \neq i} \frac{\lambda_j}{\lambda_j - \lambda_i} \right) = (-1)^i. \quad (47)$$

521 where  $\operatorname{sgn}$  is the sign function (which maps 0 to 0,  $\mathbb{R}_{<0}$  to  $-1$ , and  $\mathbb{R}_{>0}$  to 1). Finally,

$$P_t(0) \geq Q_t(0) \quad (48)$$

522 which concludes the proof.

523 ( $\implies$ ): Assume  $P_t$  alternates  $s < t + 1$  times between  $-1$  and 1 on  $\bar{\Lambda}$ . We want to show that  $P_t$  is not  
 524 optimal in the sense described above. To do so, we construct a perturbation of  $P_t$  that increases its  
 525 value in 0 while still satisfying the constraint  $P_t(\Lambda) \subset [-1, 1]$ .

526 Let's define

$$\lambda_0^{(1)} < \dots < \lambda_0^{(t_0)} < \lambda_1^{(1)} < \dots < \lambda_1^{(t_1)} < \dots < \lambda_{s-1}^{(1)} < \dots < \lambda_{s-1}^{(t_{s-1})} \quad (49)$$

527 such that

$$P_t(\lambda_i^{(j)}) = (-1)^i \quad \text{and} \quad \forall \lambda \in \bar{\Lambda}, \left( \exists (i, j) | \lambda = \lambda_i^{(j)} \text{ or } |P_t(\lambda)| < 1 \right). \quad (50)$$

528 In short,  $(\lambda_i^{(j)})_{(i,j)}$  describes all the extremal points of  $P_t$  in  $\Lambda$ . The indices change when the sign  
 529 changes, while the exponents are used to express the possible consecutive repetitions of the same  
 530 value ( $-1$  or  $1$ ).

531 Set  $(r_i)_{i \in \llbracket 0, s \rrbracket}$  as any set of positive numbers satisfying:

$$0 < r_0 < \inf(\Lambda) < \lambda_0^{(1)} < \lambda_0^{(t_0)} < r_1 < \dots < r_s < \lambda_{s-1}^{(1)} < \lambda_{s-1}^{(t_{s-1})} < \sup(\Lambda) < r_s. \quad (51)$$

532 By definition, each interval  $[r_i, r_{i+1}]$ ,  $i \in \llbracket 0, s-1 \rrbracket$ , contains  $\lambda_i^{(j)}$  for all  $j$ , but no other extremal  
 533 points of  $P_t$  in  $\overline{\Lambda}$ . Hence,  $P_t([r_i, r_{i+1}] \cap \overline{\Lambda})$  doesn't contain  $(-1)^{i+1}$ . Since,  $\bigcup_{i < s, i \text{ even}} [r_i, r_{i+1}] \cap \overline{\Lambda}$   
 534 is compact, and by continuity of  $P_t$ ,  $P_t\left(\bigcup_{i < s, i \text{ even}} [r_i, r_{i+1}] \cap \overline{\Lambda}\right)$  is compact. Therefore,

$$\exists \varepsilon_{-1} > 0 | P_t \left( \bigcup_{i < s, i \text{ even}} [r_i, r_{i+1}] \cap \overline{\Lambda} \right) \subset [-1 + \varepsilon_{-1}, 1]. \quad (52)$$

535 Similarly, we obtain

$$\exists \varepsilon_1 > 0 | P_t \left( \bigcup_{i < s, i \text{ odd}} [r_i, r_{i+1}] \cap \overline{\Lambda} \right) \subset [-1, 1 - \varepsilon_1]. \quad (53)$$

536 We are now equipped to build the aforementioned perturbation. Let

$$Q_t(X) \triangleq \prod_{i \in \llbracket 0, s-1 \rrbracket} (r_i - X). \quad (54)$$

537 Note that  $Q_t$  has a degree  $s \leq t$  and satisfies

$$Q_t \left( \bigcup_{i < s, i \text{ even}} [r_i, r_{i+1}] \cap \overline{\Lambda} \right) \subset \mathbb{R}^- \quad \text{and} \quad Q_t \left( \bigcup_{i < s, i \text{ odd}} [r_i, r_{i+1}] \cap \overline{\Lambda} \right) \subset \mathbb{R}^+. \quad (55)$$

538 Moreover, those sets are compact, by continuity of  $Q_t$ , and consequently bounded. We can therefore  
 539 choose a small enough  $\varepsilon > 0$  such that

$$\varepsilon \min Q_t \left( \bigcup_{i < s, i \text{ even}} [r_i, r_{i+1}] \cap \overline{\Lambda} \right) > -\varepsilon_{-1} \quad \text{and} \quad \varepsilon \max Q_t \left( \bigcup_{i < s, i \text{ odd}} [r_i, r_{i+1}] \cap \overline{\Lambda} \right) < \varepsilon_1.$$

540 This leads to

$$(P_t + \varepsilon Q_t)(\Lambda) \subset [-1, 1]. \quad (56)$$

541 And as by definition,  $Q_t(0) > 0$ ,

$$(P_t + \varepsilon Q_t)(0) > P_t(0). \quad (57)$$

542 Finally  $(P_t + \varepsilon Q_t) \in \mathbb{R}_t[X]$ . This proves that  $P_t$  is not optimal.

543 (Uniqueness) *Here, we prove that the optimal polynomial is necessarily unique. To do so, we introduce*  
 544 *2 optimal polynomials and show there must actually be identical.*

545 Let  $P_t$  an optimal polynomial and  $(\lambda_i)_{i \in \llbracket 0, t \rrbracket} \in \Lambda^{t+1}$  a family on which  $P_t$  interpolates alternatively  
 546 1 and  $-1$ . Let any other feasible polynomial  $Q_t$  and  $(v_i)_{i \in \llbracket 0, t \rrbracket}$  its values on  $(\lambda_i)_{i \in \llbracket 0, t \rrbracket}$ :

$$Q_t = \sum_{i=0}^t v_i L_{\lambda_i}. \quad (58)$$

547 We have showed in the first point of this proof that the optimal values of  $v_i$  are alternatively 1 and  
 548  $-1$ . Consequently, if  $Q_t$  is also optimal,

$$Q_t(\lambda_i) = P_t(\lambda_i) \quad (59)$$

549 for all  $i \in \llbracket 0, t \rrbracket$ , which characterizes polynomials of degree  $t$ . Then

$$Q_t = P_t \quad (60)$$

550 which shows that the optimal polynomial is unique.  $\square$



551 We now give the formal statement and the proof of the second result, used in Subsection 4.4.

552 **Theorem C.2.**  $T_n(\sigma_K)$  is optimal for all  $n$  if and only if  $\sigma_K$  verifies the equioscillation property  
 553 (Definition 4.3, hence  $\sigma_K = \sigma_K^\Lambda$  by Theorem C.1) and  $\bar{\Lambda} = \sigma_K^{-1}([-1, 1])$ , i.e. the inverse mapping  
 554  $\sigma_K^{-1}$  transforms the interval  $[-1, 1]$  into exactly  $\bar{\Lambda}$ .

555 Before providing the proof, we first highlight that the property

$$\forall \lambda \in \Lambda, \sigma_K(\lambda) \in [-1, 1] \quad (61)$$

556 can equivalently be written

$$\bar{\Lambda} \subset \sigma_K^{-1}([-1, 1]). \quad (62)$$

557 In other words, we are interested in the case where the reverse inclusion holds as well. This means  
 558 that

$$\sigma_K(\lambda) \in [-1, 1] \Rightarrow \lambda \in \bar{\Lambda}. \quad (63)$$

559 This corresponds to a stronger form of optimality of  $\sigma_K$ : it “fully” uses the available assumption  
 560 related to  $\Lambda$ , in the sense that no point can be added to  $\bar{\Lambda}$  without breaking the condition  $\sigma_K(\Lambda) \subset$   
 561  $[-1, 1]$ . For example, on Figure 3,  $\sigma_3^\Lambda$  does not satisfy the later property on the center graph, but  
 562 satisfies it on the right graph. Here, we show that under this condition,  $T_n(\sigma_K) = T_n(\sigma_K^\Lambda)$  is optimal  
 563 (in the sense of (16)) for all  $n \in \mathbb{N}$ .

564 In Section 4.4, we give another view of this condition for  $T_n(\sigma_K)$  to be optimal for all  $n$ . We can  
 565 decompose  $\Lambda$  as the union of  $K$  intervals  $\Lambda_i$  such that they have disjoint interiors and they are all  
 566 mapped to  $[-1, 1]$  by  $\sigma_K$ . Hence,  $\sigma_K$  maps  $\Lambda$  to  $[-1, 1]$  exactly  $K$  times.

567 *Proof.* From Theorem C.1,  $T_n(\sigma_K)$  is optimal for all  $n$  if and only if, for all  $n$ , there exist a sorted  
 568 family of  $(\lambda_i)_{i \in \llbracket 0, nK \rrbracket}$  such that,  $T_n(\sigma_K(\lambda_i)) = (-1)^i$ .

569 Let  $n \in \mathbb{N}$ . We observe that by definition of  $T_n$ ,

$$T_n(\sigma_K(\lambda)) = \pm 1 \quad \text{if and only if} \quad \exists j \in \llbracket 0, n \rrbracket \mid \sigma_K(\lambda) = \cos \frac{j\pi}{n}. \quad (64)$$

570 We successively treat both directions: ( $\Leftarrow$ ) we assume  $\sigma_K$  oscillates and  $\bar{\Lambda} = \sigma_K^{-1}([-1, 1])$ . We  
 571 aim to prove that  $T_n(\sigma_K)$  is optimal for all  $n \in \mathbb{N}$ .

572 By equioscillation property, we know that there exists  $\lambda'_i$  such that

$$\sigma_K(\lambda'_i) = (-1)^i. \quad (65)$$

573 By the intermediate value theorem, we know that for any  $i \in \llbracket 0; K \rrbracket$ , between the pair  $\lambda'_i, \lambda'_{i+1}$ , there  
 574 exist sorted  $(\mu_i^j)_{ni < j < (n+1)i}$  such that for all  $j \in \llbracket ni + 1; (n+1)i - 1 \rrbracket$ ,

$$\sigma_K(\mu_i^j) = \cos \frac{j\pi}{n}. \quad (66)$$

575 We identify  $\lambda_{ni} = \lambda'_i$  and  $\lambda_j = \mu_{\lfloor j/n \rfloor}^j$  for all  $j$  not multiple of  $n$ . Then, for all  $\ell \in \llbracket 0, nK \rrbracket$ :

$$T_n(\sigma_K(\lambda_\ell)) = (-1)^\ell. \quad (67)$$

576 By Theorem C.1, we conclude that  $T_n(\sigma_K)$  is optimal for all  $n \in \mathbb{N}$ .

577 ( $\Rightarrow$ ) We assume  $T_n(\sigma_K)$  is optimal for all  $n \in \mathbb{N}$ . Clearly,  $\sigma_K$  is optimal ( $n = 1$ ), and then  
 578 equioscillates. We prove that moreover

$$\bar{\Lambda} = \sigma_K^{-1}([-1, 1]). \quad (68)$$

579 On the one hand, for any  $j \in \llbracket 0, n \rrbracket$ , there exist at most  $K$  different  $\lambda$  that verifies  $\sigma_K(\lambda) = \cos \frac{j\pi}{n}$   
 580 since  $\sigma_K$  has a degree  $K$  and is not constant. Therefore, there exist at most  $(n+1)K$  different  $\lambda$   
 581 such that  $\exists j \in \llbracket 0, n \rrbracket \mid \sigma_K(\lambda) = \cos \frac{j\pi}{n}$ , and by Eq.(64), there thus exist at most  $(n+1)K$  different  $\lambda$   
 582 such that  $T_n(\sigma_K(\lambda)) = \pm 1$ .

583 On the other hand, the optimality of  $T_n(\sigma_K)$  implies the existence of at least  $nK + 1$  such  $\lambda$  in  $\bar{\Lambda}$ .

584 Hence all but at most  $K - 1$  values  $\lambda$  such that  $\sigma_K(\lambda) \in \{\cos \frac{j\pi}{n}, j \in \llbracket 0, n \rrbracket\}$  belong to  $\bar{\Lambda}$ .  
 585 This holds for all  $n$ . Therefore for  $n$  large enough, all  $x$  such that  $\sigma(x) \in [-1, 1]$  are as close as we  
 586 want to some  $\lambda \in \bar{\Lambda}$ . Since  $\bar{\Lambda}$  is a closed set, then all  $x$  such that  $\sigma(x) \in [-1, 1]$  are actually in  $\bar{\Lambda}$ .  
 587 We conclude

$$\bar{\Lambda} \supset \sigma_K^{-1}([-1, 1]). \quad (69)$$

588

□

## 589 D Cycling step-sizes

590 In this appendix, we provide an analysis of momentum methods with cyclical step-sizes and derive  
 591 some non-asymptotically optimal variants.

### 592 D.1 Derivation of optimal algorithm with $K = 2$ alternating step sizes

593 In this section, we consider the case where  $\Lambda$  is the union of 2 intervals of same size (see (3)).

594 We start by introducing the following algorithm, and we will prove later that this algorithm is optimal  
 (Theorem D.1)

---

**Algorithm 6:** Optimal momentum method with alternating step-sizes ( $K = 2$ )

---

**Input:** Initialization  $x_0, \mu_1 < L_1 < \mu_2 < L_2$  (where  $L_1 - \mu_1 = L_2 - \mu_2$ )

**Set:**  $\rho = \frac{L_2 + \mu_1}{L_2 - \mu_1}, R = \frac{\mu_2 - L_1}{L_2 - \mu_1}, c = \sqrt{\frac{\rho^2 - R^2}{1 - R^2}}$

$\omega_0 = 2$

$x_1 = x_0 - \frac{1}{L_1} \nabla f(x_0)$

**for**  $t = 1, 2, \dots$  **do**

$$\omega_t = \left(1 - \frac{1}{4c^2} \omega_{t-1}\right)^{-1}$$

$$h_t = \frac{\omega_t}{L_1} \quad (\text{if } t \text{ is even}), \quad h_t = \frac{\omega_t}{\mu_2} \quad (\text{if } t \text{ is odd})$$

$$x_{t+1} = x_t - h_t \nabla f(x_t) + (\omega_t - 1)(x_t - x_{t-1})$$

**end**

---

595

596 **Theorem D.1.** Let  $f \in \mathcal{C}_\Lambda$  and  $x_0 \in \mathbb{R}^d$ . Assume  $\Lambda$  defined as in (3). The iterates of Algorithm 6  
 597 verifies the condition

$$x_{2n} - x_* = \frac{T_n(\sigma_2^\Lambda(H))}{T_n(\sigma_2^\Lambda(0))} (x_0 - x_*) \quad (70)$$

598 and this is the optimal convergence rate over  $\mathcal{C}_\Lambda$ .

599 *Proof.* We begin by showing the optimality of the algorithm. Using Proposition D.2, the polynomial  
 600 in (70) equioscillates on  $\Lambda$ , which makes it optimal by Theorem C.1. By optimal, this means this is  
 601 the optimal convergence rate any first order algorithm can reach (See (11)). We invite the reader to  
 602 read Appendix D.3, where we study in details the properties of the alternating steps sizes strategy  
 603 (i.e.,  $K = 2$ ).

604 As in Appendix B.1, we derive here the constructive approach that leads us to this algorithm.

605 We now start showing that the iterates of Algorithm 6 follow (70). From eq. (70), projecting onto the  
 606 eigenspace of eigenvalue  $\lambda$ ,

$$x_{2n} - x_* = \frac{T_n(\sigma_2^\Lambda(\lambda))}{T_n(\sigma_2^\Lambda(0))} (x_0 - x_*). \quad (71)$$

607 Then, we find a recursion definition for the subsequence  $(x_{2n})_{n \in \mathbb{N}}$ . Let  $n \geq 1$ .

$$x_{2(n+1)} - x_* = \frac{T_{n+1}(\sigma_2^\Lambda(\lambda))}{T_{n+1}(\sigma_2^\Lambda(0))}(x_0 - x_*), \quad (72)$$

$$= \frac{2\sigma_2^\Lambda(\lambda)T_n(\sigma_2^\Lambda(\lambda)) - T_{n-1}(\sigma_2^\Lambda(\lambda))}{T_{n+1}(\sigma_2^\Lambda(0))}(x_0 - x_*), \quad (73)$$

$$= \frac{2\sigma_2^\Lambda(\lambda)T_n(\sigma_2^\Lambda(0))}{T_{n+1}(\sigma_2^\Lambda(0))}(x_{2n} - x_*) - \frac{T_{n-1}(\sigma_2^\Lambda(0))}{T_{n+1}(\sigma_2^\Lambda(0))}(x_{2(n-1)} - x_*). \quad (74)$$

608 Note that if  $\sigma_2^\Lambda(\lambda)$  were a degree 1 polynomial in  $\lambda$ , then we would recognize a momentum update.  
 609 Here,  $\sigma_2^\Lambda(\lambda)$  is actually a degree 2 polynomial in  $\lambda$ . We will then try to identify 2 steps of momentum.  
 610 From here, let

$$c \triangleq \frac{1}{2} \left( \left( \sigma_K(0) + \sqrt{\sigma_K(0)^2 - 1} \right)^{1/2} + \left( \sigma_K(0) - \sqrt{\sigma_K(0)^2 - 1} \right)^{1/2} \right) = \sqrt{\frac{\sigma_K(0) + 1}{2}} \quad (75)$$

611 be the unique positive real number  $c$  verifying  $T_2(c) = 2c^2 - 1 = \sigma_K(0)$ . We end up with

$$x_{2(n+1)} - x_* = \frac{2\sigma_2^\Lambda(\lambda)T_{2n}(c)}{T_{2(n+1)}(c)}(x_{2n} - x_*) - \frac{T_{2(n-1)}(c)}{T_{2(n+1)}(c)}(x_{2(n-1)} - x_*). \quad (76)$$

612 Note, the above equation suggests to introduce the sequence  $z_l \triangleq T_l(c)(x_l - x_*)$ . Indeed, the above  
 613 equality simplifies

$$z_{2(n+1)} = 2\sigma_2^\Lambda(\lambda)z_{2n} - z_{2(n-1)}. \quad (77)$$

614 Let's look for 2 steps of momentum that are together equivalent to (76). We look for an algorithm of  
 615 the form

$$\forall n \geq 0, x_{n+1} = x_n - h_n \nabla f(x_n) + \frac{T_{n-1}(c)}{T_{n+1}(c)}(x_n - x_{n-1}), \quad (78)$$

616 i.e, projecting again onto the eigenspace of eigenvalue  $\lambda$ , we obtain

$$\forall n \geq 0, x_{n+1} - x_* = \left( 1 + \frac{T_{n-1}(c)}{T_{n+1}(c)} - h_n \lambda \right) (x_n - x_*) - \frac{T_{n-1}(c)}{T_{n+1}(c)}(x_{n-1} - x_*). \quad (79)$$

617 Here we introduce the notation

$$\omega_l \triangleq \left( 1 + \frac{T_{l-1}(c)}{T_{l+1}(c)} \right) = 2c \frac{T_l(c)}{T_{l+1}(c)}, \quad (80)$$

618 and the change of variable

$$\tilde{h}_l \triangleq \frac{h_l}{\omega_l}. \quad (81)$$

619 We rewrite (79) in terms of the sequence  $z$  and using the sequence  $\tilde{h}$ ,

$$\forall n \geq 0, z_{n+1} = T_{n+1}(c) \left( 1 + \frac{T_{n-1}(c)}{T_{n+1}(c)} - h_n \lambda \right) (x_n - x_*) - z_{n-1} \quad (82)$$

$$= \left( 2cT_n(c)(1 - \tilde{h}_n \lambda) \right) (x_n - x_*) - z_{n-1} \quad (83)$$

$$= \left( 2c(1 - \tilde{h}_n \lambda) \right) z_n - z_{n-1}. \quad (84)$$

620 We now need to find the right sequence  $\tilde{h}_n$  such that we recover eq. (77). Combining the 2 following

$$z_{2n+1} = \left( 2c(1 - \tilde{h}_{2n} \lambda) \right) z_{2n} - z_{2n-1} \quad (85)$$

$$z_{2n+2} = \left( 2c(1 - \tilde{h}_{2n+1} \lambda) \right) z_{2n+1} - z_{2n} \quad (86)$$

621 by isolating the odd index in the second equation and plugging it in the first one, we get

$$z_{2n+2} = \left( 4c^2(1 - \tilde{h}_{2n} \lambda)(1 - \tilde{h}_{2n+1} \lambda) - 1 - \frac{2c(1 - \tilde{h}_{2n+1} \lambda)}{2c(1 - \tilde{h}_{2n-1} \lambda)} \right) z_{2n} - \frac{2c(1 - \tilde{h}_{2n+1} \lambda)}{2c(1 - \tilde{h}_{2n-1} \lambda)} z_{2n-2}. \quad (87)$$

622 We need to identify

$$2\sigma_2^\Lambda(\lambda) = 4c^2(1 - \tilde{h}_{2n}\lambda)(1 - \tilde{h}_{2n+1}\lambda) - 1 - \frac{2c(1 - \tilde{h}_{2n+1}\lambda)}{2c(1 - \tilde{h}_{2n-1}\lambda)}, \quad (88)$$

$$1 = \frac{2c(1 - \tilde{h}_{2n+1}\lambda)}{2c(1 - \tilde{h}_{2n-1}\lambda)}. \quad (89)$$

623 Hence, we conclude from the second equation that  $\tilde{h}_{2n+1} = \tilde{h}_{2n-1} = \tilde{h}_1$  is independent of  $n$ . And  
624 the first equation then becomes

$$2\sigma_2^\Lambda(\lambda) = 4c^2(1 - \tilde{h}_{2n}\lambda)(1 - \tilde{h}_1\lambda) - 2 \quad (90)$$

625 leading also to  $\tilde{h}_{2n}$  independent of  $n$ . We observe an alternating strategy of the “pseudo-step-sizes”  
626  $\tilde{h}_0$  and  $\tilde{h}_1$ . Finally, we must fix them to

$$\sigma_2^\Lambda(\lambda) = 2c^2(1 - \tilde{h}_0\lambda)(1 - \tilde{h}_1\lambda) - 1. \quad (91)$$

627 Note this is possible because the equation above is valid for  $\lambda = 0$  for any choice of  $\tilde{h}_0$  and  $\tilde{h}_1$  and  
628 the polynomial  $\sigma_2^\Lambda + 1$  can be defined by its value in 0 and its roots that are exactly  $\frac{1}{\tilde{h}_0}$  and  $\frac{1}{\tilde{h}_1}$ . And  
629 from (155), those values are  $\mu_2$  and  $L_1$ , which gives the values  $\tilde{h}_0 = \frac{1}{L_1}$  and  $\tilde{h}_1 = \frac{1}{\mu_2}$ .

630 We now sum up what we have so far. Setting  $c$ ,  $\tilde{h}_0$  and  $\tilde{h}_1$  as described above, the iterations

$$\forall n \geq 1, x_{n+1} = x_n - \left(1 + \frac{T_{n-1}(c)}{T_{n+1}(c)}\right) \tilde{h}_{\text{mod}(n,2)} \nabla f(x_n) + \frac{T_{n-1}(c)}{T_{n+1}(c)} (x_n - x_{n-1}) \quad (92)$$

631 lead to the recursion (77).

632 Let define  $x_1 = x_0 - \tilde{h}_0 \nabla f(x_0)$ , and from the above

$$x_2 = x_1 - \left(1 + \frac{1}{2c^2 - 1}\right) \tilde{h}_1 \lambda (x_1 - x_*) + \frac{1}{2c^2 - 1} (x_1 - x_0) \quad (93)$$

$$x_2 - x_* = \frac{2c^2}{\sigma_2^\Lambda(0)} (1 - \tilde{h}_1\lambda) (x_1 - x_*) - \frac{1}{\sigma_2^\Lambda(0)} (x_0 - x_*) \quad (94)$$

$$= \frac{2c^2}{\sigma_2^\Lambda(0)} (1 - \tilde{h}_1\lambda) (1 - \tilde{h}_0\lambda) (x_0 - x_*) - \frac{1}{\sigma_2^\Lambda(0)} (x_0 - x_*) \quad (95)$$

$$= \frac{\sigma_2^\Lambda(\lambda)}{\sigma_2^\Lambda(0)} (x_0 - x_*) \quad (96)$$

$$z_2 = \sigma_2^\Lambda(\lambda). \quad (97)$$

633 Finally, the sequence  $z_{2n}$  is defined by

$$z_0 = 1, \quad (98)$$

$$z_1 = \sigma_2^\Lambda(\lambda), \quad (99)$$

$$z_{2(n+1)} = 2\sigma_2^\Lambda(\lambda) z_{2n} - z_{2(n-1)}. \quad (100)$$

634 which defines exactly  $T_n(\sigma_2^\Lambda(\lambda))$ . We conclude  $x_{2n} - x_* = \frac{T_n(\sigma_2^\Lambda(\lambda))}{T_n(\sigma_2^\Lambda(0))} (x_0 - x_*)$ .

635 We sum up the algorithm used to reach the above equality:

$$x_1 = x_0 - \tilde{h}_0 \nabla f(x_0), \quad (101)$$

$$\forall n \geq 0, x_{n+1} = x_n - \omega_n \tilde{h}_n \nabla f(x_n) + (\omega_n - 1) (x_n - x_{n-1}). \quad (102)$$

636 with  $\omega_n = \left(1 + \frac{T_{n-1}(c)}{T_{n+1}(c)}\right) = \frac{2cT_n(c)}{T_{n+1}(c)}$ . Note the recursion

$$\omega_n^{-1} = \frac{T_{n+1}(c)}{2cT_n(c)} \quad (103)$$

$$= \frac{2cT_n(c) - T_{n-1}(c)}{2cT_n(c)} \quad (104)$$

$$= 1 - \frac{T_{n-1}(c)}{2cT_n(c)} \quad (105)$$

$$= 1 - \frac{1}{4c^2} \frac{2cT_{n-1}(c)}{T_n(c)} \quad (106)$$

$$= 1 - \frac{1}{4c^2} \omega_{n-1}. \quad (107)$$

637 Finally, the sequence  $\omega$  can be computed online using the recursion

$$\omega_n = \frac{1}{1 - \frac{1}{4c^2} \omega_{n-1}} \quad (108)$$

638 with  $\omega_0 = 2$ . □

639 In this appendix, as well as in Appendix B, we end up with some equality of the form

$$\|x_t - x_*\| = \frac{T_n(\sigma_K(H))}{T_n(\sigma_K(0))} \|x_0 - x_*\|. \quad (109)$$

640 The next theorem explains how to derive the rate factor from it.

641 **Proposition 4.6.** *For a given  $\sigma_K$  such that  $\sup_{\lambda \in \Lambda} |\sigma_K(\lambda)| = 1$ , the asymptotic rate factor  $\tau^{\sigma_K}$  of*  
 642 *the method associated to the polynomial (14) is*

$$1 - \tau^{\sigma_K} = \lim_{t \rightarrow \infty} \sqrt[t]{\sup_{\lambda \in \Lambda} |P_t(\lambda; \sigma_K)|} = \left(\sigma_0 - \sqrt{\sigma_0^2 - 1}\right)^{\frac{1}{K}}, \quad \text{with } \sigma_0 \triangleq \sigma_K(0). \quad (15)$$

643 *Proof.* We observe that the rate factor of the method is upper bounded by

$$\sqrt[t]{\sup_{\lambda \in \Lambda} |Z_t^\Lambda(\lambda)|} = \sqrt[t]{\sup_{\lambda \in \Lambda} \left| \frac{T_{t/K}(\sigma_K^\Lambda(\lambda))}{T_{t/K}(\sigma_0)} \right|} = \sqrt[t]{\frac{1}{|T_{t/K}(\sigma_0)|}} \quad \text{if } \sup_{\lambda \in \Lambda} |\sigma_K(\lambda)| = 1. \quad (110)$$

644 Since  $\sigma_0 > 1$ , and by using the explicit formula of Chebyshev polynomials, we have that

$$T_{t/K}(\sigma_0) = \frac{(\sigma_0 + \sqrt{\sigma_0^2 - 1})^{t/K} + (\sigma_0 - \sqrt{\sigma_0^2 - 1})^{t/K}}{2} \underset{t \rightarrow \infty}{\sim} \frac{(\sigma_0 + \sqrt{\sigma_0^2 - 1})^{t/K}}{2}. \quad (111)$$

645 Taking the limit gives

$$\lim_{t \rightarrow \infty} \sqrt[t]{\frac{1}{|T_{t/K}(\sigma_0)|}} = \left( \frac{1}{\sigma_0 + \sqrt{\sigma_0^2 - 1}} \right)^{\frac{1}{K}} = \left( \sigma_0 - \sqrt{\sigma_0^2 - 1} \right)^{\frac{1}{K}}. \quad (112)$$

646 □

## 647 D.2 Derivation of heavy ball with $K$ step sizes cycle

648 In this section, we consider heavy ball algorithm with a cycle of  $K$  different step sizes. For  
 649 convenience, we restate Algorithm 1 below.

650 We first recall the convergence theorem 4.8 stated in Section 4.3.

---

**Algorithm 7:** Cyclical heavy ball  $\text{HB}_K(h_0, \dots, h_{K-1}; m)$

---

**Input:** Initialization  $x_0$ , momentum  $m \in (0, 1)$ , step-sizes  $\{h_0, \dots, h_{K-1}\}$

$$x_1 = x_0 - \frac{h_0}{1+m} \nabla f(x_0)$$

**for**  $t = 1, 2, \dots$  **do**       $x_{t+1} = x_t - h_{\text{mod}(t,K)} \nabla f(x_t) + m(x_t - x_{t-1})$

**end**

---

651 **Theorem 4.8.** *The worst-case rate of convergence of Algorithm 1 on  $\mathcal{C}_\Lambda$  with an arbitrary momentum*  
 652  *$m$  and an arbitrary sequence of step-sizes  $\{h_i\}$  is*

$$1 - \tau = \begin{cases} \sqrt{m}, & \text{if } \sigma_{\sup} \leq 1 \\ \sqrt{m} \left( \sigma_{\sup} + \sqrt{\sigma_{\sup}^2 - 1} \right)^{1/K}, & \text{if } \sigma_{\sup} \in \left( 1, \frac{1+m^K}{2(\sqrt{m})^K} \right) \\ \geq 1 \text{ (no convergence)} & \text{if } \sigma_{\sup} \geq \frac{1+m^K}{2(\sqrt{m})^K} \end{cases}, \quad (19)$$

653 where  $\sigma_{\sup} \triangleq \sup_{\lambda \in \Lambda} |\sigma(\lambda; \{h_i\}, m)|$ , and  $\sigma(\lambda; \{h_i\}, m)$  is the  $K$ -degree polynomial

$$\sigma(\lambda; \{h_i\}, m) \triangleq \frac{1}{2} \text{Tr} \left( \begin{bmatrix} \frac{1+m-h_{K-1}\lambda}{\sqrt{m}} & -1 \\ 1 & 0 \end{bmatrix} \begin{bmatrix} \frac{1+m-h_{K-2}\lambda}{\sqrt{m}} & -1 \\ 1 & 0 \end{bmatrix} \dots \begin{bmatrix} \frac{1+m-h_0\lambda}{\sqrt{m}} & -1 \\ 1 & 0 \end{bmatrix} \right). \quad (20)$$

654 *Proof.* Note a first trick. Let's define  $x_{-1} \triangleq x_0 - \frac{h_0}{1+m} \nabla f(x_0)$ . This way,  $x_{t+1} = x_t -$   
 655  $h_{\text{mod}(t,K)} \nabla f(x_t) + m(x_t - x_{t-1})$  holds for any  $t \geq 0$  (including  $t = 0$ ).

656 Now, let's introduce the polynomials  $P_t$  defined by Proposition 4.1 as  $x_t - x_* = P_t(H)(x_0 - x_*)$ .  
 657 From now, in order to highlight the  $K$ -cyclic behavior, we introduce the indexation  $t = nK + r$ , with  
 658  $r \in \llbracket 0, K-1 \rrbracket$ .

659 We verify the following:

$$P_{-1}(\lambda) = 1 - \frac{h_0\lambda}{1+m}, \quad (113)$$

$$P_0(\lambda) = 1, \quad (114)$$

$$\forall n \geq 0, r \in \llbracket 0, K-1 \rrbracket, P_{nK+r+1}(\lambda) = (1+m-h_r\lambda)P_{nK+r}(\lambda) - mP_{nK+r-1}(\lambda). \quad (115)$$

660 In order to get rid of the last occurrence of  $m$  in equation above, we introduce  $\tilde{P}_t(\lambda) \triangleq \frac{1}{(\sqrt{m})^t} P_t(\lambda)$ .

661 This way, the above can be written

$$\tilde{P}_{-1}(\lambda) = \sqrt{m} \left( 1 - \frac{h_0\lambda}{1+m} \right) = \frac{2m}{1+m} \sigma_0(\lambda), \quad (116)$$

$$\tilde{P}_0(\lambda) = 1, \quad (117)$$

$$\forall n \geq 0, r \in \llbracket 0, K-1 \rrbracket, \tilde{P}_{nK+r+1}(\lambda) = \frac{1+m-h_r\lambda}{\sqrt{m}} \tilde{P}_{nK+r}(\lambda) - \tilde{P}_{nK+r-1}(\lambda). \quad (118)$$

662 In the following, we want to determine a formulation for the polynomials  $\tilde{P}_{nK}$ . In order to do so, we  
 663 introduce the following operator:

$$A(\lambda) \triangleq \begin{pmatrix} \frac{1+m-h_{K-1}\lambda}{\sqrt{m}} & -1 \\ 1 & 0 \end{pmatrix} \dots \begin{pmatrix} \frac{1+m-h_0\lambda}{\sqrt{m}} & -1 \\ 1 & 0 \end{pmatrix} \triangleq \begin{pmatrix} a(\lambda) & b(\lambda) \\ c(\lambda) & d(\lambda) \end{pmatrix} \quad (119)$$

664 as well as the scalar valued function



$$\sigma(\lambda; \{h_i\}, m) \triangleq \frac{1}{2} \text{Tr}(A(\lambda)). \quad (120)$$

665 This operator comes naturally in

$$\begin{pmatrix} \tilde{P}_{(n+1)K}(\lambda) \\ \tilde{P}_{(n+1)K-1}(\lambda) \end{pmatrix} = \begin{pmatrix} \frac{1+m-h_{K-1}\lambda}{\sqrt{m}} & -1 \\ 1 & 0 \end{pmatrix} \begin{pmatrix} \tilde{P}_{(n+1)K-1}(\lambda) \\ \tilde{P}_{(n+1)K-2}(\lambda) \end{pmatrix} \quad (121)$$

$$= \begin{pmatrix} \frac{1+m-h_{K-1}\lambda}{\sqrt{m}} & -1 \\ 1 & 0 \end{pmatrix} \cdots \begin{pmatrix} \frac{1+m-h_0\lambda}{\sqrt{m}} & -1 \\ 1 & 0 \end{pmatrix} \begin{pmatrix} \tilde{P}_{nK}(\lambda) \\ \tilde{P}_{nK-1}(\lambda) \end{pmatrix} \quad (122)$$

$$= A(\lambda) \begin{pmatrix} \tilde{P}_{nK}(\lambda) \\ \tilde{P}_{nK-1}(\lambda) \end{pmatrix}. \quad (123)$$

666 Looking  $K$  steps at a time makes the analysis much easier as the process applying  $K$  steps is then  
667 homogeneous (we apply  $A$  and  $A$  doesn't depend on the index of the iterate).

$$\tilde{P}_{(n+1)K}(\lambda) = a(\lambda)\tilde{P}_{nK}(\lambda) + b(\lambda)\tilde{P}_{nK-1}(\lambda), \quad (124)$$

$$\tilde{P}_{(n+1)K-1}(\lambda) = c(\lambda)\tilde{P}_{nK}(\lambda) + d(\lambda)\tilde{P}_{nK-1}(\lambda). \quad (125)$$

668 Combining the two above equations (First one with incremented  $n + b(\lambda)$  times the second one -  $d(\lambda)$   
669 times the first one) leads to

$$\tilde{P}_{(n+2)K}(\lambda) = (a(\lambda) + d(\lambda))\tilde{P}_{(n+1)K}(\lambda) - (a(\lambda)d(\lambda) - b(\lambda)c(\lambda))\tilde{P}_{nK}(\lambda) \quad (126)$$

$$= 2\sigma(\lambda; \{h_i\}, m)\tilde{P}_{(n+1)K}(\lambda) - \tilde{P}_{nK}(\lambda) \quad (127)$$

670 where the second inequality is deduced after we recognize

$$a(\lambda) + d(\lambda) = \text{Tr}(A(\lambda)) = 2\sigma(\lambda; \{h_i\}, m) \quad (128)$$

671 and

$$a(\lambda)d(\lambda) - b(\lambda)c(\lambda) = \text{Det}(A(\lambda)) = 1 \quad (129)$$

672 ( $A(\lambda)$  is the product of matrices of determinant 1).

673 In equation (127) we recognize the recursion verified by e.g.  $(T_n(\sigma(\lambda; \{h_i\}, m)))_{n \in \mathbb{N}}$ , or  
674  $(U_n(\sigma(\lambda; \{h_i\}, m)))_{n \in \mathbb{N}}$ , where  $T_n$  (resp.  $U_n$ ) denotes the first (resp. second) type Tchebyshev  
675 polynomial of degree  $n$ .

676 Moreover we verify the initialization

$$\tilde{P}_0(\lambda) = 1, \quad (130)$$

$$\tilde{P}_K(\lambda) = a(\lambda)\tilde{P}_0(\lambda) + b(\lambda)\tilde{P}_{-1}(\lambda) \quad (131)$$

$$= a(\lambda) + b(\lambda) \frac{m}{1+m} \frac{1+m-h_0\lambda}{\sqrt{m}}. \quad (132)$$

677 We also notice that

$$U_n(\sigma(\lambda; \{h_i\}, m)) + \left( b(\lambda) \frac{m}{1+m} \frac{1+m-h_0\lambda}{\sqrt{m}} - d(\lambda) \right) U_{n-1}(\sigma(\lambda; \{h_i\}, m)) \quad (133)$$

678 verifies the same recursion of order 2 than  $\tilde{P}_{Kn}$  as well as the same 2 initial terms.

679 Finally, we conclude

$$\tilde{P}_{nK}(\lambda) = U_n(\sigma(\lambda; \{h_i\}, m)) + \left( b(\lambda) \frac{m}{1+m} \frac{1+m-h_0\lambda}{\sqrt{m}} - d(\lambda) \right) U_{n-1}(\sigma(\lambda; \{h_i\}, m)) \quad (134)$$

680 and

$$P_{nK}(\lambda) = (\sqrt{m})^{nK} \tilde{P}_{nK}(\lambda). \quad (135)$$

Now we have the full expression of the polynomials associated to algorithm 1. Then we can study its rate of convergence.

Note for any  $r \in \llbracket 0, K-1 \rrbracket$ , we can have a similar expression of the form

$$P_{nK+r}(\lambda) = (\sqrt{m})^{nK} (Q_r^1(\lambda)U_n(\sigma(\lambda; \{h_i\}, m)) + Q_r^2(\lambda)U_{n-1}(\sigma(\lambda; \{h_i\}, m))) \quad (136)$$

with  $Q_r^1$  and  $Q_r^2$  some fixed polynomials. This is the consequence of the fact that all sequences  $\tilde{P}_{nK+r}(\lambda)$  verify the same recursion formula. Only initialization are different.

In order to study the factor rate of this algorithm, let's first introduce  $M$  an upper bound of all the  $|Q_r^i|$ . For instance, let  $M$  defined as follow.

$$M = \max_{r \in \llbracket 0, K-1 \rrbracket, i \in \{1,2\}} \sup_{\lambda \in \Lambda} |Q_r^i(\lambda)|. \quad (137)$$

Then,

$$\|x_t - x_*\| \leq \sup_{\lambda \in \Lambda} |P_t(\lambda)| \|x_0 - x_*\| \quad (138)$$

$$\leq M (\sqrt{m})^t \left( \sup_{\lambda \in \Lambda} |U_n(\sigma(\lambda; \{h_i\}, m))| + \sup_{\lambda \in \Lambda} |U_{n-1}(\sigma(\lambda; \{h_i\}, m))| \right) \|x_0 - x_*\|, \quad (139)$$

with  $n = \lfloor \frac{t}{K} \rfloor$ .

Set  $\sigma_{\sup} \triangleq \sup_{\lambda \in \Lambda} |\sigma(\lambda; \{h_i\}, m)|$ . The worst-case rate verifies

$$\text{If } \sigma_{\sup} \leq 1, \text{ then } r_t \leq M (\sqrt{m})^t (n+1+n) = O\left(t (\sqrt{m})^t\right). \quad (140)$$

$$\text{If } \sigma_{\sup} > 1, \text{ then } r_t = O\left((\sqrt{m})^t (\sigma_{\sup} + \sqrt{\sigma_{\sup}^2 - 1})^n\right). \quad (141)$$

The first case analysis comes from the fact that  $U_n$  is bounded by  $n+1$  on  $[-1, 1]$ , while the second cases analysis comes from the fact that  $U_n(x)$  grows exponentially fast outside of  $[-1, 1]$  at a rate  $x + \sqrt{x^2 - 1}$ .

Then the factor rate verifies

$$\text{If } \sigma_{\sup} \leq 1, 1 - \tau = \sqrt{m}. \quad (142)$$

$$\text{If } \sigma_{\sup} > 1, 1 - \tau = \sqrt{m} (\sigma_{\sup} + \sqrt{\sigma_{\sup}^2 - 1})^{1/K}. \quad (143)$$

It remains to notice that  $\sqrt{m} (\sigma_{\sup} + \sqrt{\sigma_{\sup}^2 - 1})^{1/K} < 1$  is equivalent to  $\sigma_{\sup} < \frac{1+m^k}{2(\sqrt{m})^k}$ .

□

From this factor rate analysis, we can state Proposition 4.9 of Section 4.3.

**Proposition 4.9.** Let  $\sigma(\lambda; \{h_i\}, m)$  be the polynomial defined by (20), and  $\sigma_K^\Lambda$  be the optimal link function of degree  $K$  defined by (16). If the momentum  $m$  and the sequence of step-sizes  $\{h_i\}$  satisfy

$$\sigma(\lambda; \{h_i\}, m) = \sigma_K^\Lambda(\lambda), \quad (21)$$

then 1) the parameters are optimal, in the sense that they minimize the asymptotic rate factor from Theorem 4.8, 2) the optimal momentum parameter is

$$m = (\sigma_0 - \sqrt{\sigma_0^2 - 1})^{2/K}, \quad \text{where } \sigma_0 = \sigma_K^\Lambda(0), \quad (22)$$

3) the iterates from Algo. 3 with parameters  $\{h_i\}$  and  $m$  form a polynomial with recurrence (18), and 4) Algorithm 3 achieves the worst-case rate  $r_t^{\text{Alg. 3}}$  and the asymptotic rate factor  $1 - \tau^{\text{Alg. 3}}$

$$r_t^{\text{Alg. 3}} = O\left(t (\sigma_0 - \sqrt{\sigma_0^2 - 1})^{t/K}\right), \quad 1 - \tau^{\text{Alg. 3}} = (\sigma_0 - \sqrt{\sigma_0^2 - 1})^{1/K}. \quad (23)$$

704 *Proof.* For now we don't assume assumption 21 yet. Set  $\sigma_0 \triangleq \sigma(0; \{h_i\}, m)$ . Then, by definition (20)  
 705 of  $\sigma(\lambda; \{h_i\}, m)$ ,

$$\sigma_0 = \frac{1}{2} \text{Tr} \left( \begin{bmatrix} \frac{1+m}{\sqrt{m}} & -1 \\ 1 & 0 \end{bmatrix}^K \right) = T_K \left( \frac{1+m}{2\sqrt{m}} \right) = \frac{1+m^K}{2(\sqrt{m})^K}. \quad (144)$$

706 Hence, reversing this equality,

$$\sqrt{m} = \left( \sigma_0 - \sqrt{\sigma_0^2 - 1} \right)^{\frac{1}{K}}. \quad (145)$$

707 From Theorem 4.8, we therefore know

$$\text{If } \sigma_{\text{sup}} \leq 1, 1 - \tau = \left( \sigma_0 - \sqrt{\sigma_0^2 - 1} \right)^{\frac{1}{K}}. \quad (146)$$

$$\text{If } \sigma_{\text{sup}} > 1, 1 - \tau = \left( \sigma_0 - \sqrt{\sigma_0^2 - 1} \right)^{\frac{1}{K}} \left( \sigma_{\text{sup}} + \sqrt{\sigma_{\text{sup}}^2 - 1} \right)^{1/K}. \quad (147)$$

708 But, one can check that

$$\left( \sigma_0 - \sqrt{\sigma_0^2 - 1} \right)^{\frac{1}{K}} \left( \sigma_{\text{sup}} + \sqrt{\sigma_{\text{sup}}^2 - 1} \right)^{1/K} \geq \left( \frac{\sigma_0}{\sigma_{\text{sup}}} - \sqrt{\left( \frac{\sigma_0}{\sigma_{\text{sup}}} \right)^2 - 1} \right)^{\frac{1}{K}} \quad (148)$$

709 which shows that a tuning generating the polynomial  $\frac{\sigma(\lambda; \{h_i\}, m)}{\sigma_{\text{sup}}}$  would lead to a better convergence  
 710 rate. Hence, we should look for polynomials  $\sigma(\lambda; \{h_i\}, m)$  verifying  $\sigma_{\text{sup}} \leq 1$ . And then,

$$1 - \tau = \sqrt{m} = \left( \sigma_0 - \sqrt{\sigma_0^2 - 1} \right)^{\frac{1}{K}}. \quad (149)$$

711 which explain we aim at maximizing  $\sigma_0$  subject to  $\sigma_{\text{sup}} \leq 1$  ((16)).

712 Finally, we proved 1): if  $\sigma(\lambda; \{h_i\}, m) = \sigma_K^\Lambda(\lambda)$ , then the tuning is optimal in the sense that this is  
 713 the one that minimizes the asymptotic rate factor among all  $K$  steps-sizes based tuning.

714 From now, we assume

$$\sigma(\lambda; \{h_i\}, m) = \sigma_K^\Lambda(\lambda). \quad (150)$$

715 Therefore,

$$\sigma_0 = \sigma_K^\Lambda(0) \quad (151)$$

716 and 2) is already proven above.

717 3) follows directly from the definition of  $\sigma_K^\Lambda(\lambda)$ .

718 Finally, since  $\sigma_{\text{sup}} \leq 1$ , we know

$$1 - \tau = \sqrt{m} = \left( \sigma_0 - \sqrt{\sigma_0^2 - 1} \right)^{1/K} \quad (152)$$

719 which proves part of 4).

720 To prove the expression of the worst-case rate  $r_t$ , we need to apply the intermediate result (140)  
 721 instead of Theorem 4.8.

722 □

### 723 D.3 Example: alternating step sizes ( $K = 2$ )

724 **Proposition D.2.** *The strategy with 2 step sizes is optimal on the union of two intervals if and only if*  
 725 *they have the same length.*

726 *Proof.* This is a direct consequence of Theorem C.2. Indeed, it implies  $\sigma_2^\Lambda(\mu_1) = \sigma_2^\Lambda(L_2) = 1$  and  
 727  $\sigma_2^\Lambda(\mu_2) = \sigma_2^\Lambda(L_1) = -1$ .

728 This is feasible if and only if  $L_2 - \mu_2 = L_1 - \mu_1$  since  $\sigma_2^\Lambda$  is a degree 2 polynomial.

729 Indeed, set  $\sigma_2^\Lambda(x) = a(x-b)^2 + c$ . Then,  $\sigma_2^\Lambda(\mu_1) = \sigma_2^\Lambda(L_2)$  implies  $a(\mu_1 - b)^2 + c = a(L_2 - b)^2 + c$ ,  
 730 then  $|\mu_1 - b| = |L_2 - b|$  and finally  $b = \frac{\mu_1 + L_2}{2}$ . Similarly,  $\sigma_2^\Lambda(\mu_2) = \sigma_2^\Lambda(L_1)$  implies  $b = \frac{\mu_2 + L_1}{2}$ .

731 We conclude  $\frac{\mu_1 + L_2}{2} = \frac{\mu_2 + L_1}{2}$ , and  $L_2 - \mu_2 = L_1 - \mu_1$ .  $\square$

732 **Proposition 4.5.** Let  $\Lambda = [\mu_1, L_1] \cup [\mu_2, L_2]$  be an union of two intervals of the same size  
 733 ( $L_1 - \mu_1 = L_2 - \mu_2$ ) and let  $m$  be as defined in Algorithm 2. Then the minimax polynomial (solution  
 734 to (12)) is, for all  $t = 2n$ ,  $n \in \mathbb{N}_0^+$ ,

$$\frac{T_n(\sigma_2^\Lambda(\lambda))}{T_n(\sigma_2^\Lambda(0))} = \arg \min_{\substack{P \in \mathbb{R}_t[X], \\ P(0)=1}} \sup_{\lambda \in \Lambda} |P(\lambda)|, \text{ with } \sigma_2^\Lambda(\lambda) = 2 \left( \frac{1+m}{2\sqrt{m}} \right)^2 \left( 1 - \frac{\lambda}{L_1} \right) \left( 1 - \frac{\lambda}{\mu_2} \right) - 1.$$

735 *Proof.* From Theorem C.2,

$$\sigma_2^\Lambda(\mu_1) = 1, \quad (153)$$

$$\sigma_2^\Lambda(L_1) = -1, \quad (154)$$

$$\sigma_2^\Lambda(\mu_2) = -1, \quad (155)$$

$$\sigma_2^\Lambda(L_2) = 1, \quad (156)$$

736 and this implies that  $\frac{T_n(\sigma_2^\Lambda(\lambda))}{T_n(\sigma_2^\Lambda(0))}$  is optimal.

737 In particular,  $L_1$  and  $\mu_2$  are roots of  $\sigma_2^\Lambda + 1$ . Therefore, we know there exists a constant  $c$  such that  
 738  $\sigma_2^\Lambda(\lambda) = c(1 - \frac{\lambda}{L_1})(1 - \frac{\lambda}{\mu_2}) - 1$ . Moreover, evaluating this in  $\mu_1$  gives  $\sigma_2^\Lambda(\mu_1) = c(1 - \frac{\mu_1}{L_1})(1 - \frac{\mu_1}{\mu_2}) - 1 = 1$ , so  
 739  $\frac{\mu_1}{\mu_2} - 1 = 1$ , so

$$c = \frac{2}{(1 - \frac{\mu_1}{L_1})(1 - \frac{\mu_1}{\mu_2})} \quad (157)$$

$$= \frac{2L_1\mu_2}{(L_1 - \mu_1)(\mu_2 - \mu_1)} \quad (158)$$

$$= 2 \frac{\left( \frac{\mu_1 + L_2}{2} \right)^2 - R^2 \left( \frac{L_2 - \mu_1}{2} \right)^2}{\frac{1-R^2}{4}(L_2 - \mu_1)^2} \quad (159)$$

$$= 2 \frac{\rho^2 - R^2}{1 - R^2}. \quad (160)$$

740 Then,

$$\sigma_2^\Lambda(\lambda) = 2 \frac{\rho^2 - R^2}{1 - R^2} \left( 1 - \frac{\lambda}{L_1} \right) \left( 1 - \frac{\lambda}{\mu_2} \right) - 1 \quad (161)$$

741 which can be written

$$\sigma_2^\Lambda(\lambda) = 2 \left( \frac{1+m}{2\sqrt{m}} \right)^2 \left( 1 - \frac{\lambda}{L_1} \right) \left( 1 - \frac{\lambda}{\mu_2} \right) - 1 \quad (162)$$

742 with  $\left( \frac{1+m}{2\sqrt{m}} \right)^2 = \frac{\rho^2 - R^2}{1 - R^2}$ . Finally,  $m = \left( \frac{\sqrt{\rho^2 - R^2} - \sqrt{\rho^2 - 1}}{\sqrt{1 - R^2}} \right)^2$ .  $\square$

743 **Theorem 3.1** (Rate factor of  $\text{HB}_2(h_0, h_1; m)$ ). Let  $f \in \mathcal{C}_\Lambda$  and  $h_0, h_1, m \geq 0$ . The asymptotic rate  
 744 factor of Algorithm 1 with cycles of length two is

$$1 - \tau = \begin{cases} \sqrt{m} & \text{if } \sigma_{\sup} \leq 1, \\ \sqrt{m} \left( \sigma_{\sup} + \sqrt{\sigma_{\sup}^2 - 1} \right)^{\frac{1}{2}} & \text{if } \sigma_{\sup} \in \left( 1, \frac{1+m^2}{2m} \right), \\ \geq 1 \text{ (no convergence)} & \text{if } \frac{1+m^2}{2m} \leq \sigma_{\sup}, \end{cases} \quad (5)$$

745

$$\text{with } \sigma_{\sup} = \sup_{\lambda \in \{\mu_1, L_1, \mu_2, L_2, \frac{h_0+h_1}{2h_0h_1}\} \cap \Lambda} \left| 2 \left( \frac{1+m-\lambda h_0}{2\sqrt{m}} \right) \left( \frac{1+m-\lambda h_1}{2\sqrt{m}} \right) - 1 \right|. \quad (6)$$

746 *Proof.* From Theorem 4.8 applied to  $K = 2$ , we immediately have the above result with

$$\sigma_{\sup} = \sup_{\lambda \in \Lambda} \left| 2 \left( \frac{1+m-\lambda h_0}{2\sqrt{m}} \right) \left( \frac{1+m-\lambda h_1}{2\sqrt{m}} \right) - 1 \right|.$$

747 In order to conclude the proof, we therefore need to prove that the optimal value of  $|\sigma_2^\Lambda|$  can only be  
 748 reached on  $\{\mu_1, L_1, \mu_2, L_2, (1+m)\frac{h_0+h_1}{2h_0h_1}\}$ . Indeed,  $\sigma_2^\Lambda$  being convex, its maximal value can only  
 749 be reached on  $\{\mu_1, L_2\}$ . Its minimal value over  $\mathbb{R}$  is reached on  $(1+m)\frac{h_0+h_1}{2h_0h_1}$ . Therefore, over  
 750  $\Lambda$ , the minimal value of  $\sigma_2^\Lambda$  is reached on  $(1+m)\frac{h_0+h_1}{2h_0h_1}$  if the latest belongs to  $\Lambda$ . Otherwise, its  
 751 minimal value is reached to the closest point in  $\Lambda$  to  $(1+m)\frac{h_0+h_1}{2h_0h_1}$ , namely, it can be any point of  
 752  $\{\mu_1, L_1, \mu_2, L_2\}$ .  $\square$

753 **Proposition D.3** (A nice formulation of the reached polynomial in the robust region). *Assuming*  
 754  $\sigma_2^\Lambda(\lambda) \geq -1, \quad \forall \lambda \in \Lambda$ , *the polynomial associated to heavy ball algorithm with alternating step*  
 755 *sizes is exactly*

$$P_{2n}(\lambda) = (\sqrt{m})^{2n} \left[ \frac{2m}{1+m} T_{2n} \left( \sqrt{\left( \frac{1+m-\lambda h_0}{2\sqrt{m}} \right) \left( \frac{1+m-\lambda h_1}{2\sqrt{m}} \right)} \right) + \frac{1-m}{1+m} U_{2n} \left( \sqrt{\left( \frac{1+m-\lambda h_0}{2\sqrt{m}} \right) \left( \frac{1+m-\lambda h_1}{2\sqrt{m}} \right)} \right) \right]. \quad (163)$$

756 **Remark D.4.** The assumption  $\sigma_2(\lambda) \geq -1, \quad \forall \lambda \in \Lambda$  is verified in the robust region, and is useful  
 757 here because the term  $\left( \frac{1+m-\lambda h_0}{2\sqrt{m}} \right) \left( \frac{1+m-\lambda h_1}{2\sqrt{m}} \right)$  is equal to  $\frac{1+\sigma_2(\lambda)}{2}$  and must be positive to make  
 758 the above expression well defined. Otherwise the result can hold replacing the square root with some  
 759 complex number, but it brings no value when we derive the convergence rate from it.

760 *Proof.* This proof reuses elements of the proof of Theorem (4.8), especially Equation (127). For sake  
 761 of completeness and simplicity, we prove this result again directly in the special case  $K = 2$ .

762 We first recall the recursion of Algorithm 1 for  $K = 2$ . For sake of simplicity, we directly project it  
 763 onto the eigenspace associated to the eigenvalue  $\lambda$  of the Hessian of the objective function.

$$\begin{aligned} x_{2n+1} - x_* &= (1+m-h_0\lambda)(x_{2n} - x_*) - m(x_{2n-1} - x_*), \\ x_{2n+2} - x_* &= (1+m-h_1\lambda)(x_{2n+1} - x_*) - m(x_{2n} - x_*). \end{aligned} \quad (164)$$

764 Identifying  $x_t - x_* = P_t(\lambda)(x_0 - x_*)$  and  $P_t(\lambda) = (\sqrt{m})^t \tilde{P}_t(\lambda)$ ,

$$\begin{aligned} \tilde{P}_{2n+1}(\lambda) &= \frac{1+m-h_0\lambda}{\sqrt{m}} \tilde{P}_{2n}(\lambda) - \tilde{P}_{2n-1}(\lambda), \\ \tilde{P}_{2n+2}(\lambda) &= \frac{1+m-h_1\lambda}{\sqrt{m}} \tilde{P}_{2n+1}(\lambda) - \tilde{P}_{2n}(\lambda). \end{aligned} \quad (165)$$

765 Multiplying the first equation by  $\frac{1+m-h_1\lambda}{\sqrt{m}}$  and replacing  $\frac{1+m-h_1\lambda}{\sqrt{m}} \tilde{P}_{2n+1}(\lambda)$  and  $\frac{1+m-h_1\lambda}{\sqrt{m}} \tilde{P}_{2n-1}(\lambda)$   
 766 accordingly to the second equation leads to

$$\tilde{P}_{2n+2}(\lambda) + \tilde{P}_{2n}(\lambda) = \frac{1+m-h_0\lambda}{\sqrt{m}} \frac{1+m-h_1\lambda}{\sqrt{m}} \tilde{P}_{2n}(\lambda) - (\tilde{P}_{2n}(\lambda) + \tilde{P}_{2n-2}(\lambda)) \quad (166)$$

767 which can be written as in equation (127)

$$\tilde{P}_{2n+2}(\lambda) = \left( \frac{1+m-h_0\lambda}{\sqrt{m}} \frac{1+m-h_1\lambda}{\sqrt{m}} - 2 \right) \tilde{P}_{2n}(\lambda) - \tilde{P}_{2n-2}(\lambda). \quad (167)$$

768 Moreover,

$$\begin{aligned} x_1 - x_* &= (1 - \frac{h_0}{1+m}\lambda)(x_0 - x_*), \\ x_2 - x_* &= (1+m-h_1\lambda)(x_1 - x_*) - m(x_0 - x_*), \end{aligned} \quad (168)$$

769 leading to the initialization

$$\begin{aligned}\tilde{P}_1(\lambda) &= \frac{1}{\sqrt{m}}(1 - \frac{h_0}{1+m}\lambda)\tilde{P}_0(\lambda), \\ \tilde{P}_2(\lambda) &= \frac{1+m-h_1\lambda}{\sqrt{m}}\tilde{P}_1(\lambda) - \tilde{P}_0(\lambda).\end{aligned}\tag{169}$$

770 hence,

$$\tilde{P}_2(\lambda) = \left( \frac{1}{1+m} \frac{1+m-h_0\lambda}{\sqrt{m}} \frac{1+m-h_1\lambda}{\sqrt{m}} - 1 \right)\tag{170}$$

771 and recall

$$\tilde{P}_0(\lambda) = 1.\tag{171}$$

772 It remains to notice that

$$\begin{aligned}& \frac{2m}{1+m}T_{2n} \left( \sqrt{\left( \frac{1+m-\lambda h_0}{2\sqrt{m}} \right) \left( \frac{1+m-\lambda h_0}{2\sqrt{m}} \right)} \right) \\ & + \frac{1-m}{1+m}U_{2n} \left( \sqrt{\left( \frac{1+m-\lambda h_0}{2\sqrt{m}} \right) \left( \frac{1+m-\lambda h_0}{2\sqrt{m}} \right)} \right)\end{aligned}\tag{172}$$

773 verifies the same recursion as well as the same initialization for  $n = 0$  and  $n = 1$ . This allows us to  
774 identify the 2 sequences of polynomials

$$\begin{aligned}\tilde{P}_{2n}(\lambda) &= \frac{2m}{1+m}T_{2n} \left( \sqrt{\left( \frac{1+m-\lambda h_0}{2\sqrt{m}} \right) \left( \frac{1+m-\lambda h_0}{2\sqrt{m}} \right)} \right) \\ & + \frac{1-m}{1+m}U_{2n} \left( \sqrt{\left( \frac{1+m-\lambda h_0}{2\sqrt{m}} \right) \left( \frac{1+m-\lambda h_0}{2\sqrt{m}} \right)} \right)\end{aligned}\tag{173}$$

775 which concludes the proof.

776

□

777 **Corollary 3.2.** *The worst-case (asymptotic) rates  $r_t^{Alg. 2}$  and  $1 - \tau^{Alg. 2}$  of Algorithm 2 over  $\mathcal{C}_\Lambda$  are*

$$r_t^{Alg. 2} = \left( 1 + t \sqrt{\frac{\rho^2 - 1}{\rho^2 - R^2}} \right) \left( \frac{\sqrt{\rho^2 - R^2} - \sqrt{\rho^2 - 1}}{\sqrt{1 - R^2}} \right)^t, \quad 1 - \tau^{Alg. 2} = \frac{\sqrt{\rho^2 - R^2} - \sqrt{\rho^2 - 1}}{\sqrt{1 - R^2}} \quad \text{for } t \text{ even.}$$

778 *Proof.* From Proposition 4.5, Algorithm 2's parameter make  $\sigma(\lambda; \{h_i\}, m) = \sigma_2^\Lambda$ . In particular, by  
779 definition,

$$-1 \leq 2 \left( \frac{1+m-\lambda h_0}{2\sqrt{m}} \right) \left( \frac{1+m-\lambda h_1}{2\sqrt{m}} \right) - 1 \leq 1.\tag{174}$$

780 and then

$$0 \leq \sqrt{\left( \frac{1+m-\lambda h_0}{2\sqrt{m}} \right) \left( \frac{1+m-\lambda h_0}{2\sqrt{m}} \right)} \leq 1.\tag{175}$$

781 And we know that  $\forall x \leq 1, T_n(x) \leq 1$  and  $U_n(x) \leq n + 1$ .

782 Therefore, using optimal parameters, and from Proposition D.3

$$\tilde{P}_{2n}(\lambda) \leq \frac{2m}{1+m} + (2n+1) \frac{1-m}{1+m} = 1 + 2n \frac{1-m}{1+m}.\tag{176}$$

783 And the worst-case rate is then upper bounded

$$r_t = \left( 1 + t \frac{1-m}{1+m} \right) (\sqrt{m})^t\tag{177}$$

784 for all  $t$  even.

785 It remains to plug  $m$  expression into the above to conclude.

□

786 The next theorem sums up the results of Proposition 3.3 and Table 1.

787 **Theorem D.5** (Asymptotic speedup of HB with alternating step sizes).

788 1. Let  $R \in [0, 1)$  be a fixed number, then  $\sqrt{m} \underset{\kappa \rightarrow 0}{=} 1 - \frac{2\sqrt{\kappa}}{\sqrt{1-R^2}} + o(\sqrt{\kappa})$ .

789 2. Let

$$R(\kappa) \underset{\kappa \rightarrow 0}{=} 1 - \frac{\sqrt{\kappa}}{2} + o(\sqrt{\kappa}), \quad \text{i.e., } \Lambda \approx [\mu, \mu + \frac{\sqrt{\mu L}}{4}] \cup [L - \frac{\sqrt{\mu L}}{4}, L],$$

790 then  $\sqrt{m} \underset{\kappa \rightarrow 0}{=} 1 - 2\sqrt[4]{\kappa} + o(\sqrt[4]{\kappa})$ , therefore leading to a new square root acceleration.

791 3. Let

$$R(\kappa) \underset{\kappa \rightarrow 0}{=} 1 - 2\gamma\kappa + o(\kappa), \quad \text{i.e., } \Lambda \approx [\mu, (1 + \gamma)\mu] \cup [L - \gamma\mu, L],$$

792 then  $\sqrt{m} \underset{\kappa \rightarrow 0}{=} \sqrt{1 + \frac{1}{\gamma}} - \sqrt{\frac{1}{\gamma}} + o(\kappa)$ , therefore leading to a constant complexity.

793 This is summed up in the Table 2.

| Relative gap $R$          | Set $\Lambda$                                                              | Rate factor $\tau$                    | Speedup $\tau/\tau^{\text{PHB}}$ |
|---------------------------|----------------------------------------------------------------------------|---------------------------------------|----------------------------------|
| $R \in [0, 1)$            | $[\mu, \mu + R(L - \mu)] \cup [L - R(L - \mu), L]$                         | $\frac{2\sqrt{\kappa}}{\sqrt{1-R^2}}$ | $(1 - R^2)^{-\frac{1}{2}}$       |
| $R = 1 - \sqrt{\kappa}/2$ | $[\mu, \mu + \frac{\sqrt{\mu L}}{4}] \cup [L - \frac{\sqrt{\mu L}}{4}, L]$ | $2\sqrt[4]{\kappa}$                   | $\kappa^{-\frac{1}{4}}$          |
| $R = 1 - 2\gamma\kappa$   | $[\mu, (1 + \gamma)\mu] \cup [L - \gamma\mu, L]$                           | indep. of $\kappa$                    | $O(\sqrt{\kappa})$               |

Table 2: Case study of the convergence of Algorithm 2 as a function of  $R$ , in the regime where  $\kappa \rightarrow 0$ . The **first line** corresponds to a situation where  $R$  is independent of  $\kappa$ , and we observe a constant gain w.r.t. heavy ball. The **second line** study a setting in which  $R$  depends on  $\sqrt{\kappa}$ , meaning the two intervals in  $\Lambda$  are relatively small. The asymptotic rate reads  $(1 - 2\sqrt[4]{\kappa})^t$ , beating the  $(1 - 2\sqrt{\kappa})^t$  lower bound. Finally, in the **third line**,  $R$  depends on  $\kappa$ , the two intervals in  $\Lambda$  are so small that the convergence becomes  $O(1)$ , i.e., is independent of  $\kappa$ .

794 *Proof.*

795 1. Let  $R \in [0, 1)$ . The momentum  $m$  satisfies

$$\begin{aligned} \sqrt{m} &\underset{\kappa \rightarrow 0}{=} \frac{\sqrt{1 + O(\kappa) - R^2} - \sqrt{4\kappa + O(\kappa^2)}}{\sqrt{1 - R^2}} \\ &\underset{\kappa \rightarrow 0}{=} \frac{\sqrt{1 - R^2} + O(\kappa) - 2\sqrt{\kappa} + O(\kappa)}{\sqrt{1 - R^2}} \\ &\underset{\kappa \rightarrow 0}{=} 1 - \frac{2\sqrt{\kappa}}{\sqrt{1 - R^2}} + O(\kappa). \end{aligned}$$

796 2. Let  $R(\kappa) \underset{\kappa \rightarrow 0}{=} 1 - \frac{\sqrt{\kappa}}{2} + o(\sqrt{\kappa})$ . The momentum  $m$  verifies

$$\begin{aligned} \sqrt{m} &= \sqrt{\frac{\left(\frac{1+\kappa}{1-\kappa}\right)^2 - R^2}{1 - R^2}} - \sqrt{\frac{\left(\frac{1+\kappa}{1-\kappa}\right)^2 - 1}{1 - R^2}} \\ &= \sqrt{\frac{\left(\frac{1+\kappa}{1-\kappa}\right)^2 - 1}{1 - R^2}} + 1 - \sqrt{\frac{\left(\frac{1+\kappa}{1-\kappa}\right)^2 - 1}{1 - R^2}}. \end{aligned}$$

797

We first focus on

$$\begin{aligned} \frac{\left(\frac{1+\kappa}{1-\kappa}\right)^2 - 1}{1 - R^2} &\underset{\kappa \rightarrow 0}{=} \frac{4\kappa + O(\kappa^2)}{\sqrt{\kappa} + o(\sqrt{\kappa})} \\ &\underset{\kappa \rightarrow 0}{=} 4\sqrt{\kappa} + o(\sqrt{\kappa}). \end{aligned}$$

798

Then,

$$\begin{aligned} \sqrt{m} &= \sqrt{\frac{\left(\frac{1+\kappa}{1-\kappa}\right)^2 - 1}{1 - R^2} + 1} - \sqrt{\frac{\left(\frac{1+\kappa}{1-\kappa}\right)^2 - 1}{1 - R^2}} \\ &\underset{\kappa \rightarrow 0}{=} \sqrt{1 + 4\sqrt{\kappa} + o(\sqrt{\kappa})} - \sqrt{4\sqrt{\kappa} + o(\sqrt{\kappa})} \\ &\underset{\kappa \rightarrow 0}{=} 1 + 2\sqrt{\kappa} + o(\sqrt{\kappa}) - 2\sqrt[4]{\kappa} + o(\sqrt[4]{\kappa}) \\ &\underset{\kappa \rightarrow 0}{=} 1 - 2\sqrt[4]{\kappa} + o(\sqrt[4]{\kappa}). \end{aligned}$$

799

3. Let  $R(\kappa) \underset{\kappa \rightarrow 0}{=} 1 - 2\gamma\kappa + o(\kappa)$ . The momentum  $m$  verifies

$$\begin{aligned} \sqrt{m} &= \sqrt{\frac{\left(\frac{1+\kappa}{1-\kappa}\right)^2 - R^2}{1 - R^2}} - \sqrt{\frac{\left(\frac{1+\kappa}{1-\kappa}\right)^2 - 1}{1 - R^2}} \\ &= \sqrt{\frac{\left(\frac{1+\kappa}{1-\kappa}\right)^2 - 1}{1 - R^2} + 1} - \sqrt{\frac{\left(\frac{1+\kappa}{1-\kappa}\right)^2 - 1}{1 - R^2}}. \end{aligned}$$

800

We first focus on

$$\frac{\left(\frac{1+\kappa}{1-\kappa}\right)^2 - 1}{1 - R^2} \underset{\kappa \rightarrow 0}{=} \frac{4\kappa + O(\kappa^2)}{4\gamma\kappa + o(\kappa)} \underset{\kappa \rightarrow 0}{=} \frac{1}{\gamma} + o(\kappa).$$

801

Then,

$$\begin{aligned} \sqrt{m} &= \sqrt{\frac{\left(\frac{1+\kappa}{1-\kappa}\right)^2 - 1}{1 - R^2} + 1} - \sqrt{\frac{\left(\frac{1+\kappa}{1-\kappa}\right)^2 - 1}{1 - R^2}} \\ &\underset{\kappa \rightarrow 0}{=} \sqrt{1 + \frac{1}{\gamma} + o(\kappa)} - \sqrt{\frac{1}{\gamma} + o(\kappa)} \\ &\underset{\kappa \rightarrow 0}{=} \sqrt{1 + \frac{1}{\gamma}} - \sqrt{\frac{1}{\gamma}} + o(\kappa). \end{aligned}$$

802

□

803 **D.4 Example: 3 cycling step sizes**804 **Proposition D.6.** *The strategy with 3 step sizes is optimal on the union of two intervals if and only if*  
805 *they are of the form*

$$\left[ \mu, \mu + (L - \mu) \left( \frac{1}{2} - \frac{R}{2} + \frac{1 - R^2}{4} \right) \right] \cup \left[ L - (L - \mu) \left( \frac{1}{2} - \frac{R}{2} - \frac{1 - R^2}{4} \right), L \right],$$

806 *for some  $R \in [0, 1]$ .*807 *Proof.* From Theorem C.2, we know that  $T_n(\sigma_3)$  is optimal for all  $n$  if and only if,  $\Lambda$  is the  
808 union of 3 different intervals that are mapped on  $[-1, 1]$ . Since, we are looking for  $\Lambda$  being the  
809 union of 2 intervals, we know 2 of the 3 intervals  $\Lambda$  is composed of share an extremity. Recall



810  $\Lambda = [\mu_1, L_1] \cup [\mu_2, L_2]$ . By symmetry, we can assume without loss of generality that  $[\mu_1, L_1]$  is  
 811 mapped to  $[-1, 1]$  twice, and  $[\mu_2, L_2]$  once. Let's then introduce  $x \in (\mu_1, L_1)$  and say:

$$\sigma_3(\mu_1) = 1, \quad (178)$$

$$\sigma_3(x) = -1, \quad (179)$$

$$\sigma_3(L_1) = 1, \quad (180)$$

$$\sigma_3(\mu_2) = 1, \quad (181)$$

$$\sigma_3(L_2) = -1. \quad (182)$$

812 Note we also know that  $x$  is a local minima of  $\sigma_3$ , leading to  $\sigma_3'(x) = 0$ . We now know 3 roots of  
 813  $\sigma_3 + 1$  and 3 roots of  $\sigma_3 - 1$ , leading to:

$$\sigma_3(\lambda) - 1 = c(\lambda - \mu_1)(\lambda - L_1)(\lambda - \mu_2), \quad (183)$$

$$\sigma_3(\lambda) + 1 = c(\lambda - x)^2(\lambda - L_2), \quad (184)$$

814 for some non-zero constant  $c$ . Here, we want to remove the dependency in  $x$  or  $c$ . Using the two  
 815 equalities above,

$$(\lambda - x)^2(\lambda - L_2) - (\lambda - \mu_1)(\lambda - L_1)(\lambda - \mu_2) = \frac{2}{c}. \quad (185)$$

816 Matching the coefficients of the above polynomial leads to

$$2x + L_2 = \mu_1 + L_1 + \mu_2 \quad (186)$$

$$\text{and} \quad (187)$$

$$2xL_2 + x^2 = \mu_1L_1 + \mu_1\mu_2 + L_1\mu_2. \quad (188)$$

817 We plug the expression of  $x$  we get from the first equality into the second one,

$$L_2(\mu_1 + L_1 + \mu_2 - L_2) + \left( \frac{\mu_1 + L_1 + \mu_2 - L_2}{2} \right)^2 = \mu_1L_1 + \mu_1\mu_2 + L_1\mu_2. \quad (189)$$

818 From here, for simplicity, we define

$$r_i \triangleq \frac{L_i - \mu_i}{L_2 - \mu_1}, \quad \text{for } i \in \{1, 2\}. \quad (190)$$

819 Replacing  $L_1$  and  $\mu_2$  by their expression using  $\mu_1, L_2, r_1$  and  $r_2$  leads to

$$r_1 = 2\sqrt{r_2} - r_2. \quad (191)$$

820 The reciprocal holds and we can find  $x$  using Equation (186) or (188). Note if Equation (191) holds,  
 821 we can directly express  $\sigma_3$  as the unique polynomial verifying

$$\sigma_3(\mu_1) = 1, \quad (192)$$

$$\sigma_3(L_1) = 1, \quad (193)$$

$$\sigma_3(\mu_2) = 1, \quad (194)$$

$$\sigma_3(L_2) = -1. \quad (195)$$

822 We can therefore conclude

$$\sigma_3(\lambda) = 1 - 2 \frac{(\lambda - \mu_1)(\lambda - L_1)(\lambda - \mu_2)}{(L_2 - \mu_1)(L_2 - L_1)(L_2 - \mu_2)}. \quad (196)$$

823 From the new notations  $r_1, r_2, \mu = \mu_1, L = L_2$ , we know  $T_n(\sigma_3^\Lambda)$  is optimal for all  $n$  if and only if

$$\Lambda = [\mu, \mu + r_1(L - \mu)] \cup [L - r_2(L - \mu), L]. \quad (197)$$

824 Let  $R$  be

$$R = \frac{\mu_2 - L_1}{L_2 - \mu_1} \quad (198)$$

825 as in the 2 step sizes setting. Here, we have  $R = 1 - r_1 - r_2$  and we assume  $r_1 = 2\sqrt{r_2} - r_2$ .  
 826 Combining those 2 equalities gives:

$$r_1 = \frac{1}{2} - \frac{R}{2} + \frac{1 - R^2}{4}, \quad (199)$$

$$r_2 = \frac{1}{2} - \frac{R}{2} - \frac{1 - R^2}{4}, \quad (200)$$

827 leading to the desired result, i.e.,

$$\Lambda = [\mu, \mu + (L - \mu)(\frac{1}{2} - \frac{R}{2} + \frac{1 - R^2}{4})] \cup [L - (L - \mu)(\frac{1}{2} - \frac{R}{2} - \frac{1 - R^2}{4}), L].$$

828 □

829 **Theorem D.7** (Asymptotic speedup of heavy ball when cycling over 3 step-sizes). *Let  $R \in [0, 1)$  be*  
 830 *a fixed number, then*

$$\sqrt{m} \underset{\kappa \rightarrow 0}{=} 1 - 2\sqrt{\kappa} \sqrt{\frac{1 - R^2/9}{1 - R^2}} + o(\sqrt{\kappa}). \quad (201)$$

831 *Proof.* From Equation (145),

$$\sqrt{m} = \left( \sigma_3^{(\Lambda)}(0) - \sqrt{\sigma_3^{(\Lambda)}(0)^2 - 1} \right)^{\frac{1}{3}} \quad \text{with} \quad \sigma_3^{(\Lambda)}(0) = 1 + 2 \frac{\mu_1 L_1 \mu_2}{(L_2 - \mu_1)(L_2 - L_1)(L_2 - \mu_2)}.$$

832 Using the previous notations,

$$\mu = \mu_1, \quad (202)$$

$$L = L_2, \quad (203)$$

$$\kappa = \frac{\mu}{L}, \quad (204)$$

$$r_i \triangleq \frac{L_i - \mu_i}{L_2 - \mu_1}, \quad \text{for } i \in \{1, 2\}, \quad (205)$$

833 we can write  $\sigma_3^{(\Lambda)}$  as

$$\sigma_3^{(\Lambda)}(0) = 1 + 2 \frac{\mu_1 L_1 \mu_2}{(L_2 - \mu_1)(L_2 - L_1)(L_2 - \mu_2)}, \quad (206)$$

$$= 1 + 2 \frac{\kappa(\kappa + r_1(1 - \kappa))(1 - r_2(1 - \kappa))}{(1 - \kappa)^3(1 - r_1)r_2}, \quad (207)$$

$$\underset{\kappa \rightarrow 0}{=} 1 + 2\kappa \frac{r_1(1 - r_2)}{(1 - r_1)r_2}, \quad (208)$$

$$= 1 + 2\kappa \frac{\left(\frac{1}{2} - \frac{R}{2} + \frac{1 - R^2}{4}\right) \left(\frac{1}{2} + \frac{R}{2} - \frac{1 - R^2}{4}\right)}{\left(\frac{1}{2} + \frac{R}{2} + \frac{1 - R^2}{4}\right) \left(\frac{1}{2} - \frac{R}{2} - \frac{1 - R^2}{4}\right)}, \quad (209)$$

$$= 1 + 2\kappa \frac{9 - 10R^2 + R^4}{1 - 2R^2 + R^4}, \quad (210)$$

$$= 1 + 2\kappa \frac{(1 - R^2)(9 - R^2)}{(1 - R^2)^2}, \quad (211)$$

$$= 1 + 2\kappa \frac{9 - R^2}{1 - R^2}. \quad (212)$$

834 Then introducing briefly  $\varepsilon \triangleq \kappa \frac{9-R^2}{1-R^2} \xrightarrow{\kappa \rightarrow 0} 0$ ,

$$\sqrt{m} = \left( \sigma_3^{(\Lambda)}(0) - \sqrt{\sigma_3^{(\Lambda)}(0)^2 - 1} \right)^{\frac{1}{3}}, \quad (213)$$

$$= \left( 1 + 2\varepsilon - \sqrt{1 + 4\varepsilon + 4\varepsilon^2 - 1} \right)^{\frac{1}{3}}, \quad (214)$$

$$\underset{\kappa \rightarrow 0}{=} 1 - \frac{2}{3}\sqrt{\varepsilon} + o(\sqrt{\varepsilon}). \quad (215)$$

835 Plugging  $\varepsilon$  expression into the latest gives

$$\sqrt{m} \underset{\kappa \rightarrow 0}{=} 1 - 2\sqrt{\kappa} \sqrt{\frac{1 - R^2/9}{1 - R^2}} + o(\sqrt{\kappa}). \quad (216)$$

836

□

## 837 E Beyond quadratic objective: local convergence of cycling methods

838 In this section, we prove a result of local convergence of the cyclical heavy ball method out of  
839 quadratic setting. We first recall the Theorem 5.1 stated in Section 5:

840 **Theorem 5.1** (Local convergence). *Let  $f : \mathbb{R}^d \mapsto \mathbb{R}$  be a (potentially non-quadratic) twice continu-*  
841 *ously differentiable function,  $x_*$  a local minimizer, and  $H$  be the Hessian of  $f$  at  $x_*$  with  $Sp(H) \subseteq \Lambda$ .*  
842 *Let  $x_t$  denote the result of running Algorithm 1 with parameters  $h_1, h_2, \dots, h_K, m$ , and let  $1 - \tau$  be*  
843 *the linear convergence rate on the quadratic objective (OPT). Then we have*

$$\forall \varepsilon > 0, \exists \text{ open set } V_\varepsilon : x_0, x_* \in V_\varepsilon \implies \|x_t - x_*\| = O((1 - \tau + \varepsilon)^t) \|x_0 - x_*\|. \quad (24)$$

844 *Proof.* For any  $k$  multiple of  $K$ , consider  $S_k$  the operator applying  $k$  steps of cycling Heavy Ball on  
845 the iterates  $x_t$  and  $x_{t-1}$  (note since  $k$  is a multiple of  $K$ , Algorithm 1 consists in repeating the operator  
846  $S_k$ ). Namely  $S_k$  is an operator on  $\mathbb{R}^{2d}$  verifying  $S_k((x_t, x_{t-1})) = (x_{t+k}, x_{t+k-1})$ . This operator is  
847 a composition of gradients of  $f$  and affine functions, and so it is continuously differentiable.

848 Applying the mean value theorem along each coordinate of  $S_k$ , we have that there exists a matrix-  
849 valued function  $M(v_1, v_2)$  for all  $v_1, v_2$  in the domain of  $S_k$  such that

$$S_k(v_1) - S_k(v_2) = M(v_1, v_2)(v_1 - v_2), \quad (217)$$

850 where the  $i^{th}$  rows of  $M(v_1, v_2)$  is the gradient of the  $i^{th}$  output of  $S_k$  evaluated at a vector on the  
851 segment between  $v_1$  and  $v_2$ .

$$M(v_1, v_2) = \begin{pmatrix} \nabla(S_k)_1(w_1)^T \\ \vdots \\ \nabla(S_k)_i(w_i)^T \\ \vdots \\ \nabla(S_k)_{2d}(w_{2d})^T \end{pmatrix} \text{ where } \forall i \in \llbracket 1, 2d \rrbracket, \begin{cases} (S_k)_i \text{ denotes the } i\text{th coordinate of } S_k. \\ w_i \text{ is a point on the segment } [v_1, v_2]. \end{cases} \quad (218)$$

852 By continuity of those gradients, taking  $v_1$  and  $v_2$  sufficiently close to  $(x_*, x_*)$ ,  $M(v_1, v_2)$  can be  
853 chosen arbitrarily close to the Jacobian of  $S_k$  in  $(x_*, x_*)$  denoted by  $JS_k^*$ .

854 Since by assumption the algorithm converges on the quadratic form induced by  $H$  at the rate  $1 - \tau$ ,  
855 we conclude that the spectral radius of  $JS_k^*$  is upper bounded by  $1 - \tau$ .

856 From the previous point, we can find a small enough neighborhood of  $(x_*, x_*)$  such that  $M(v_1, v_2)$   
857 has a spectral radius arbitrarily close to  $1 - \tau$ , in particular smaller than 1.

858 Furthermore, it's known for any  $\varepsilon > 0$ , there exists an operator norm  $\|\cdot\|$  such that  $\|M(v_1, v_2)\| <$   
859  $1 - \tau + \varepsilon$ . (see e.g. [Bertsekas, 1997, Proposition A.15]).

860 Hence, for any  $\varepsilon > 0$ , there exists a neighborhood  $V$  of  $(x_*, x_*)$  and an operator norm  $\|\cdot\|$  as  
861 described above such that  $S_k$  is a  $(1 - \tau + \varepsilon)$ -contraction on  $V$  for the norm  $\|\cdot\|$ .

862 This leads to convergence to the only fixed point  $(x_*, x_*)$  with a convergence rate smaller than any  
863  $1 - \tau + \varepsilon$ .

864 Moreover, the first step of the Algorithm 1 is continuous with respect to  $x_0$ . Hence, for any  $V \in \mathbb{R}^{2d}$   
865 neighborhood of  $(x_*, x_*)$ , there exists  $W \in \mathbb{R}^d$  a neighborhood of  $x_*$ , such that

$$x_0 \in W \implies (x_1, x_0) \in V. \quad (219)$$

866 Finally, for any  $\varepsilon > 0$ , there exists  $W$  a neighborhood of  $x_*$  such that the Algorithm 1 converges to  
867  $x_*$  with a rate smaller than  $1 - \tau + \varepsilon$ .

868 □

## 869 **F Experimental setup**

870 Benchmarks we run using a Google colab public instance with a single CPU. Producing the results  
871 of Figure 4 took 50 minutes with this setup. The code to reproduce this figure is attached with the  
872 supplementary material in the jupyter notebook benchmarks.ipynb .
